1           **Title: Heritable differences in synaptic zinc-transporter levels drive variation in**  
2 **learned birdsong**

3

4           **Authors:**

5           David G. Mets,<sup>1</sup> W. Hamish Mehaffey,<sup>1</sup> Bradley M. Colquitt,<sup>1</sup> and Michael S.  
6 Brainard<sup>1,2</sup>

7

8           **Affiliations**

9           <sup>1</sup> Center for Integrative Neuroscience, University of California, San Francisco, CA  
10 94158; Howard Hughes Medical Institute, University of California, San Francisco, CA 94158.

11           <sup>2</sup> Departments of Physiology and Psychiatry, University of California, San Francisco,  
12 CA 94158.

13

14

15

16

17 **Abstract:**

18 Complex learned behaviors exhibit striking variation within populations, yet how  
19 heritable factors contribute to such inter-individual differences remains largely unknown. Here,  
20 we used behavioral-genetic analysis within a Bengalese finch population (*Lonchura striata*  
21 *domestica*) to investigate molecular and circuit mechanisms underlying heritable differences  
22 in the tempo of learned birdsong. We identified a genomic locus encoding the zinc transporter  
23 ZIP11 and found that *zip11*(*SLC39A11*) transcript was expressed at higher levels in song  
24 control circuitry of faster singing birds. Reducing soluble zinc increased synaptic currents in  
25 motor circuitry and accelerated song, whereas reducing ZIP11 slowed song. Our results  
26 reveal a novel zinc-dependent mechanism that modulates neural activity to drive differences  
27 in behavior and suggest that natural variation in learning may preferentially target modulatory  
28 processes rather than core neural machinery.

29

30 **One sentence summary:** Heritable levels of a synaptic zinc transporter drive inter-  
31 individual differences in circuit excitability and learned song

32

33

34

35

36 **Main Text:**

37 Natural variation in complex behaviors within a population forms a crucial substrate for  
38 selection and, more broadly, is thought to promote the overall success of a species (1).  
39 However, while recent studies have identified heritable genetic factors that contribute to inter-  
40 individual differences in innate behaviors, especially across species (2–7), understanding how  
41 such factors drive variation in complex learned behaviors within a population remains poorly  
42 understood. This reflects in part the dual challenge of needing to disambiguate which aspects  
43 of inter-individual differences in learned phenotypes reflect genetic rather than experiential  
44 factors and pinpointing the influence of those factors within the distributed neural circuitry that  
45 shapes behavior(8). Birdsong—a complex motor skill acquired through cultural transmission  
46 and subserved by well-delineated neural circuitry (9–12)—offers an attractive model(13) for  
47 studying heritable sources of variation in learned behavior. In particular, song tempo—a  
48 defining characteristic of the male’s courtship song and motor skill performance more  
49 generally (14–20)—is shaped both by experience during learning from a tutor and by heritable  
50 factors (21–28). Moreover, while the characteristic tempo at which an adult bird sings varies  
51 by only a few percent from day to day, the tempos at which different individuals sing can span  
52 more than a factor of two (14, 16, 29). Although the precision and reproducibility of song  
53 tempo at the level of individual birds has facilitated identification of the neural circuitry that  
54 controls song production and enables learning more broadly (30–39), the mechanisms that  
55 give rise to inter-individual variation, and any specific genetic constraints that govern them,  
56 remain unknown. Here, we use an unbiased behavioral-genetic approach to identify a zinc  
57 transporter linked to variation in learned song tempo, and then leverage the detailed  
58 understanding of birdsong neurobiology to uncover a novel mechanism whereby inter-  
59 individual differences in expression of this transporter drive heritable behavioral variation via  
60 zinc-dependent modulation of synaptic currents within song control circuitry.

61 **Genetic linkage for song tempo identifies a ZIP-type zinc transporter**

62 To investigate heritable contributions to inter-individual differences in learned song, we  
63 first quantified naturally occurring variation in tempo within a genetically heterogeneous  
64 breeding population of Bengalese finches maintained by our laboratory (29). We collected  
65 DNA and recorded the adult songs produced by each individual, as well as the father's tutor  
66 song from which they had learned (Fig. 1A). Across the study population, individuals  
67 produced songs at tempos (quantified as the median number of syllables sung per second,  
68 see Methods) that were strongly correlated with the tempos of their fathers' songs (Fig. 1B,  
69 slope = 0.43,  $r = 0.39$ ,  $P < 0.0001$ , two tailed  $t$ -test). However, even within families in which  
70 brothers were tutored by the same father, there could be significant variation in tempo (Fig.  
71 1A-C); some families had narrow, approximately Gaussian distributions of tempo, but many  
72 had broad or multi-modal distributions (Fig. 1C). Such non-Gaussian patterns within families  
73 suggest the influence of a small number of segregating genetic alleles that have a large  
74 impact on song tempo (40, 41), that might therefore be identified through genetic analysis  
75 even within modestly sized populations.

76 To identify genomic regions associated with heritable differences in song tempo, we  
77 examined the relationship across the population between inter-individual variation in DNA and  
78 song tempo. We first assembled a chromosome-level genome sequence for the Bengalese  
79 finch that served as a reference for the analysis (RefSeq assembly accession number  
80 GCF\_005870125.1, see (42) and Methods). For each of 509 birds, from families for which we  
81 collected DNA from male offspring and one or both parents, we then sequenced ~400,000  
82 short stretches of DNA (50-65 base pairs) at defined locations distributed throughout the  
83 genome (see Methods). We selected approximately 51,000 of these locations that exhibited  
84 DNA variation across individuals in the form of single nucleotide polymorphisms (SNPs) and  
85 could therefore be used as potentially informative markers for which specific alleles were  
86 transmitted from parents to offspring. To assess the strength of association between allelic  
87 variation at each locus and variation in tempo, we applied a Transmission Disequilibrium Test  
88 (TDT, see Methods and (43)). This method takes advantage of knowledge about parentage to  
89 restrict analysis for each family to loci that are variable within that family and is comparatively  
90 robust to issues arising from population stratification that can confound genome-wide

91 association studies (43, 44). However, as only a subset of families contributes to allelic  
92 variation at a given locus, TDT statistics from adjacent loci within a region are non-redundant  
93 and were therefore combined in a sliding window used to scan the genome for regions of  
94 interest. To assess statistical significance, we compared the strength of empirically observed  
95 associations between genetic variation and tempo against a null distribution of genome-wide  
96 maximum values derived from repeating the entirety of the analysis for 10,000 null data sets  
97 that preserved the allelic state and familial associations for each bird, but randomly shuffled  
98 song tempo (Fig. 1D, S1).

99 Significant association of allelic state with song tempo was evident for genomic regions  
100 on three chromosomes (Fig. 1D, Chromosomes 1, 18, and Z). Moreover, for each of these  
101 regions, differences in specific SNPs could account for ~10% differences in tempo across  
102 individuals (Fig. 1E, S2). Two of these regions, on Chromosomes 1 and Z, were each  
103 relatively large (on the order of megabases) and contained many genes (Fig. S2). However,  
104 the region on Chromosome 18 spanned only ~350 kilobases (Fig. 1E), suggesting that  
105 substantial variation in tempo might arise from polymorphisms within a single gene. Indeed, a  
106 closer examination of this region revealed that the specific allelic variants at five adjacent loci  
107 (Fig. 1E) accounted for substantial variation in mean song tempo; for example, at nucleotide  
108 11605768 on Chromosome 18, birds that were homozygous for thymine ('T/T') had an  
109 average tempo that was 10.1% faster than for birds that were homozygous for cytosine ('C/C')  
110 (Fig. 1F,  $7.45 \pm 0.06$  syl/s vs.  $8.20 \pm 0.13$  syl/s,  $P < 0.001$ , two tailed *t*-test). These five  
111 markers all fall within introns of the avian homolog of the *SLC39A11* (*zip11*) gene, suggesting  
112 that variation within this gene or nearby regulatory regions might account for a component of  
113 inter-individual variation in learned song tempo.

114 The predicted avian protein encoded by the *zip11* gene displays 75% identity to the  
115 human zinc/iron-regulated transporter-related protein 11 (ZIP 11)—a zinc transporter  
116 conserved from yeast to humans and implicated in the import of extracellular zinc to the  
117 cytoplasm (45). While ZIP11 has primarily been studied in the gut of mammalian systems

118 (46), ZIP-type zinc transporters, including ZIP11, are expressed in the brain (45, 47), where  
119 the concentration and distribution of soluble zinc could contribute to neural circuit function  
120 (48). These observations thus link polymorphisms in a region that encodes the Bengalese  
121 finch homolog of the ZIP11 zinc transporter to variation in song tempo, raising the possibility  
122 that inter-individual differences in tempo stem in part from heritable differences in zinc  
123 regulation.

124 ***zip11 is expressed in song premotor circuitry at levels that correlate with song tempo***

125 Previous investigations indicate that song tempo reflects the rate of neural activity  
126 propagation within song premotor circuitry, including the telencephalic nucleus HVC (12, 30–  
127 32, 35–39). Hence, the expression of *zip11* in this circuitry would be well-positioned to  
128 influence circuit dynamics underlying song tempo. To evaluate the pattern of *zip11* expression  
129 in the avian forebrain, we performed *in situ* hybridization in sagittal brain sections containing  
130 HVC. The *zip11* probe labeled cells in both HVC and surrounding tissue (Fig. 2B; boundary of  
131 HVC indicated by dashed line). Moreover, most *zip11* labeled cells (83%) were co-labeled  
132 with a probe for the excitatory neuronal marker *vglut2* (*SLC17A6*), while most *vglut2* labeled  
133 cells (85%) were co-labeled with *zip11*, and the strength of fluorescence signals for these two  
134 probes was strongly correlated (Pearson's  $r$  of 0.77). Such co-extensive labeling indicates  
135 that *zip11* is widely expressed in excitatory neurons both within and around HVC, and raises  
136 the possibility that inter-individual differences in the levels of ZIP11 expression within song  
137 premotor circuitry contribute to heritable differences in learned song.

138 To determine whether levels of *zip11* expression differ across birds, and whether any  
139 differences correlate with variation in song tempo, we collected mRNA samples from the  
140 brains of 17 Bengalese finches that sang at a broad range of tempos. We separately  
141 analyzed tissue from HVC and from 'non-song' regions surrounding HVC that contained none  
142 of the specialized brain nuclei that have been implicated in song production (Fig. 2C). For  
143 each sample, we measured the levels of *zip11* transcript by quantitative polymerase chain  
144 reaction. Across individuals, *zip11* transcript levels varied by more than two-fold both in HVC

145 and in non-song regions; moreover, across individuals, transcript levels in both regions were  
146 positively correlated with song tempo, with ~10% change in tempo per fold change in *zip11*  
147 (Fig. 2D-E, HVC:  $r = 0.56$ , slope = 0.73,  $P < 0.02$ , two tailed *t*-test; surround:  $r = 0.65$ , slope =  
148 0.85,  $P < 0.005$ , two tailed *t*-test;  $n = 17$  birds from 6 nests). These correlations for non-song  
149 regions raise the possibility that ZIP11 may contribute to variation in behaviors other than  
150 song, while the correlations within HVC indicate that heritable differences in levels of ZIP11  
151 within song control circuitry could play a causal role in determining inter-individual differences  
152 in song tempo.

153 We next investigated potential mechanisms whereby ZIP11 mediated zinc transport  
154 could influence neural circuitry that underlies song tempo. A role for zinc regulation has not  
155 figured prominently in models of neural circuit function. However, it has long been appreciated  
156 that soluble zinc is present at high levels in the brain, including avian song control regions,  
157 and is co-released with glutamate at many central synapses (49–51). Moreover, zinc exerts  
158 widespread modulatory effects on both voltage and ligand-gated ion channels, and several  
159 recent studies indicate that zinc manipulations can alter synaptic and circuit function (52–57).  
160 To investigate how ZIP11 might influence neural activity in HVC, we assessed the subcellular  
161 localization of ZIP11 protein using a commercially available antibody raised against a portion  
162 of mouse ZIP11 that is 99% homologous to the same region of Bengalese finch ZIP11 (see  
163 Methods). Immunofluorescent labeling revealed that ZIP11 protein is enriched in discrete  
164 puncta that almost completely co-localize with an antibody directed to VGLUT2, which  
165 specifically marks glutamatergic synapses (Fig. 3B, MERGE, Pearson's  $r$  of 0.72 between  
166 ZIP11 and VGLUT2 antibody staining; 68% of ZIP11 puncta were positive for VGLUT2 protein  
167 and 70% of VGLUT2 puncta were positive for ZIP11 protein). This distribution of the ZIP11  
168 transporter suggests that it could modulate activity within the HVC microcircuit by shaping the  
169 level and distribution of soluble zinc at excitatory synapses.

170 We explored the potential role of zinc in modulating synaptic transmission within HVC  
171 by assessing the effects of zinc chelation on evoked currents in a brain slice preparation. We  
172 elicited antidromic action potentials in premotor HVC neurons that project to RA (HVC-RA  
173 neurons) by stimulating the fiber tract leading to RA, outside of the boundaries of HVC (Fig.



174 3C). The axons of HVC-RA neurons make extensive local synapses within HVC (58–60).  
175 Hence, by antidromically activating HVC-RA neurons and measuring excitatory post-synaptic  
176 currents (EPSCs) in other downstream HVC neurons, we could assay the effects of zinc  
177 manipulation on circuit components that contribute to the propagation of neural activity within  
178 HVC and the control of song timing. We used intracellular recordings to first identify an  
179 individual HVC neuron in which EPSCs could be driven by antidromic stimulation, and then  
180 measured changes to EPSCs following bath application of a zinc chelator [TPEN [N,N,N,N-  
181 tetrakis (2-pyridinylmethyl)-1,2-ethanediamine] or ZX1 (see Methods)]. Consistent with reports  
182 in other systems (53, 56), we found that zinc chelation in HVC increased post-synaptic drive.  
183 In some cases, there was a simple scaling in the magnitude of the EPSC elicited by  
184 antidromic stimulation (Figs. 3D and S3A). In other cases, there was also an increase in  
185 polysynaptic events after stimulation (Fig. S3B). Correspondingly, we found that zinc  
186 chelation caused an increase in both the peak amplitude of EPSCs (Fig. 3E,  $18 \pm 5\%$   
187 increase after chelation,  $P < 0.005$ , paired t-test,  $n = 12$  experiments,  $n = 6$  birds) and the total  
188 charge transfer (Fig. S3C,  $26.5 \pm 10\%$  increase after chelation,  $P < 0.01$ , paired t-test,  $n = 12$   
189 experiments,  $n = 6$  birds). These electrophysiological measurements indicate that reducing  
190 soluble zinc increases the amplitude of EPSCs within HVC and the overall excitability of the  
191 HVC microcircuit. Such marked *in vitro* effects of zinc manipulation on the excitability within  
192 the HVC circuit suggest that regulation of  $Zn^{2+}$  levels, including through ZIP11, has the  
193 potential to influence the speed of activity propagation through HVC, and prompted us to next  
194 evaluate if perturbing this system *in vivo* in adult birds would directly alter the tempo of  
195 learned song.

### 196 **Levels of soluble zinc and Zip11 are causally linked to song tempo**

197 We tested whether zinc levels can influence the tempo of adult song by measuring  
198 changes to song following systemic injections of the zinc chelator, clioquinol (CQ), an  
199 established, non-toxic means of reducing levels of soluble zinc in behaving animals (61). CQ  
200 injection markedly increased song tempo across all experiments (Fig. 4A-D, top,  $6.2 \pm 1.7\%$   
201 average increase in median tempo for  $n = 6$  birds, range 0.3 – 0.9 syl/s,  $P < 0.02$  for each  
202 bird, Mood's median test). In contrast, tempo was unaffected following injection of vehicle



203 alone (Fig. 4A-D, bottom;  $0.59 \pm 0.25\%$  average change in median tempo for  $n = 6$  birds,  $P >$   
204  $0.1$  for each bird, Mood's median test). Notably, neither CQ (Fig. 4A, 'Experimental') nor  
205 vehicle (Fig. 4A, 'Control') caused apparent changes to the number or spectral structure of  
206 song syllables (Fig. 4B, compare 'Pre' to 'Post').

207 To more directly link ZIP11 levels to song tempo, we evaluated the effect of reducing  
208 ZIP11 selectively in HVC by using small interfering RNAs (siRNAs, (62)). We designed  
209 several siRNAs to target *zip11* transcript and screened these in Bengalese finch primary  
210 neural cultures to identify candidates causing ~50% reduction of endogenous *zip11* transcript  
211 (Fig. S2). We then injected anti-*zip11* siRNA complexed with a transfection agent bilaterally  
212 into HVC of adult birds and measured the impact on learned song tempo (Fig. 4E-H,  
213 Experimental). For each individual injected with anti-*zip11* siRNA, a co-reared brother was  
214 injected with a control siRNA that targeted no known Bengalese finch transcript (Fig. 4E-H,  
215 Control). Neither injection caused immediate changes to song structure. However, 48 hours  
216 after the injection, the songs of all birds in the 'Experimental' group were significantly slowed  
217 relative to their pre-injection values (Fig. 4F-H, top,  $-7.0 \pm 1.8\%$  average change in median  
218 tempo,  $n = 4$  birds;  $P < 0.02$  for each bird, Mood's median test). In contrast, the control group  
219 displayed no changes to song tempo (Fig. 4F-H, bottom,  $0.90 \pm 0.5\%$  average change in  
220 median tempo),  $n = 4$  brothers;  $P > 0.1$  for each bird). The consistent effects of reducing *zip11*  
221 transcript on song tempo demonstrate that differences in ZIP11 levels within HVC can  
222 account causally for inter-individual differences in this complex learned phenotype.

## 223 Discussion:

224 It is widely appreciated that behavior is shaped by an interplay of genetics and  
225 experience (8). However, the mechanisms whereby heritable factors contribute to inter-  
226 individual differences in learned behaviors are still poorly understood. Our findings  
227 demonstrate the efficacy of an unbiased behavioral-genetic approach in proceeding from a  
228 phenotype of interest to underlying mechanisms that contribute to inter-individual variation. In  
229 the songbird, this approach enabled the identification of three genomic regions that each

230 account for ~10% variation in the tempo of learned song, and revealed a novel zinc-  
231 dependent mechanism that modulates circuit function and behavior. These findings begin to  
232 bridge the gap between the genetic, circuit, and behavioral levels of inter-individual variation  
233 in learned behaviors and raise the possibility that one way by which evolution has achieved a  
234 balance between individuality and robustness is by targeting modulatory processes rather  
235 than the core machinery of circuit function.

236 Our unbiased behavioral-genetic approach to identifying specific sources of inter-  
237 individual variation in song complements studies that seek a general understanding of circuit  
238 function through neural recordings and circuit perturbations. For birdsong, such prior work has  
239 provided a detailed account of song control circuitry and linked the rate of neural activity  
240 propagation in HVC to the precise timing of song (12, 30–32, 34–38). However, despite this  
241 understanding, even extensive measurements of how song circuitry differs across individuals  
242 could, at best, identify only correlative evidence regarding what causes some birds to sing at  
243 over twice the tempo of others (14, 28, 29, 63). Here, a behavioral-genetic approach enabled  
244 us to proceed in a directed fashion from inter-individual variation in tempo towards underlying  
245 causal mechanisms mediated by differences in ZIP11 levels at glutamatergic synapses in  
246 HVC. While we focused in this study on *zip11*, we also identified two other regions of the  
247 genome where inter-individual differences had large effects on tempo (~10%). The ability to  
248 detect genomic regions that have such large effects on behavior likely derives from the  
249 structure of our study, which examines how the transmission of alleles within each family  
250 contributes to phenotypic variation; this approach is similar to hybridization studies or rare  
251 variant studies in human pedigrees, in which a limited number of genetic variants within a  
252 population may contribute to large inter-individual differences in phenotypes. In this respect,  
253 we expect that examination of different Bengalese finch pedigrees, or genome-wide  
254 associational studies across larger populations, would reveal additional genomic regions  
255 linked to tempo. More broadly, our results support the potential of such approaches in  
256 systems such as the songbird—where behavior is subserved by well-delineated neural  
257 circuitry—in identifying and pinpointing novel mechanisms that drive inter-individual variation in  
258 complex phenotypes.

259

260           Although zinc modulation does not play a prominent role in most contemporary models  
261 of circuit dynamics, our findings support the idea that active regulation of zinc levels may  
262 constitute a general mechanism for modulating behaviorally relevant neural activity. Indeed,  
263 not only is zinc co-released with glutamate at many central synapses, but work in mammalian  
264 systems indicates that artificial manipulation of soluble zinc by chelation can alter synaptic  
265 and circuit function both *in vitro* and *in vivo* (49, 53, 55, 56, 64). While zinc interacts with a  
266 multitude of biological processes that are potentially relevant to circuit function (48, 51, 52), it  
267 is noteworthy in the context of our results that synaptic zinc, co-released with glutamate, can  
268 act directly on glutamate receptors to attenuate excitatory post-synaptic currents (53, 56).  
269 Hence, zinc chelation may increase synaptic currents in HVC and speed song by reducing  
270 levels of synaptic zinc, while higher levels of ZIP11—which is a member of a class of  
271 transporters that import zinc from extracellular space to the cytoplasm (45, 47, 65)—may  
272 similarly contribute to faster songs by reducing levels of soluble zinc at the synapse.  
273 Moreover, our finding that *zip11* levels are correlated between song and non-song regions  
274 raises the possibility that heritable differences in ZIP11 may influence the excitability and  
275 temporal dynamics of neural circuits underlying a variety of other behaviors in a coordinated  
276 fashion. Indeed, given the widespread expression of ZIP transporters, including ZIP11, in the  
277 nervous systems of species ranging from nematodes to humans, our results suggest that  
278 similar zinc-dependent processes may be an evolutionarily conserved mechanism for  
279 modulating multiple aspects of neural circuit function and behavior (47, 66).

280

281           The mechanisms that we have identified in adult birds may also play a role in the  
282 earliest stages of song learning, as HVC is implicated not only in song production but also in  
283 the sensory learning of the tutor song in juvenile birds (67, 68). It has long been hypothesized  
284 that such learning is constrained by an innate “template” that establishes a bias for birds to  
285 learn preferentially from songs of their own species (21, 25, 27, 69–72), and our prior work  
286 has extended this idea by showing that individual birds within a species learn most effectively  
287 when they are presented with tutor songs at tempos that match their individual innate  
288 predispositions (28). However, while the concept of templates that constrain which stimuli are

289 effective in guiding learning has been highly influential, how such biases are instantiated at a  
290 circuit level remains unclear. Our results suggest that such biases could result in part from a  
291 concordance between the structure of instructive sensory stimuli and the biophysically  
292 determined properties of the circuits upon which they act(73). For example, if ZIP11  
293 contributes to differences in the temporal dynamics of HVC circuitry(16, 36, 38, 74) even prior  
294 to tutoring, then tutor songs at the appropriately matched tempo may more effectively drive  
295 the cellular and circuit changes that instantiate sensory learning. More broadly, this suggests  
296 that innate differences in circuit biophysics may lead to a distribution, within the population, of  
297 sensitivities to specific statistics of the natural world that enable some individuals to learn  
298 better from, and perhaps seek, experiences that match their predispositions (22, 23, 26, 28,  
299 71, 75, 76).

301 The correlation between *zip11* expression and song tempo even in non-song brain  
302 regions indicates that ZIP11 may contribute to variation in diverse other behaviors subserved  
303 by those regions. Most simply, this might include variation in the temporal dynamics of other  
304 movements; however, it likewise could include variation along any axis of behavior that is  
305 influenced by changes to the synaptic strength or excitability within underlying neural circuitry.  
306 This is especially interesting from the perspective that song is a courtship behavior that  
307 female birds use in part to select their mates (17, 20). The joint influences of experience and  
308 heritability on tempo render it an informative signal about the relatedness of the singer (77,  
309 78), while the possibility that other behavioral traits covary with tempo suggests that it might  
310 additionally provide females with signals about inter-individual differences that are relevant to  
311 assessment of a male's fitness and compatibility. These considerations raise intriguing  
312 questions for future work regarding what constellation of behavioral traits covary with heritable  
313 differences in song structure and whether females are attentive to the aspects of song  
314 structure that encode such behavioral variation.

316 Finally, we note that the relative obscurity, from the standpoint of contemporary circuit  
317 models, of ZIP-dependent changes in circuit dynamics may reflect a more general principle  
318 regarding the generation of natural variation in behavior. In particular, while inter-individual

319 variation in behavior is an evolutionary imperative, it cannot arise at the expense of  
320 fundamental circuit functionality. Thus, while circuit perturbations or mutagenesis that grossly  
321 disrupt behaviors can reveal critical components of neural machinery, our findings suggest  
322 that investigations of naturally occurring variation may preferentially uncover more subtle  
323 mechanisms—such as the modulatory processes described here—that enable inter-individual  
324 differences within a population while leaving intact the indispensable parts of brain function.

WITHDRAWN  
see manuscript DOI for details

325 **References and Notes**

326

- 327 1. A. Forsman, L. Wennersten, Inter-individual variation promotes ecological success of  
328 populations and species: evidence from experimental and comparative studies.  
329 *Ecography*. **39**, 630–648 (2016).
- 330 2. P. T. McGrath *et al.*, Parallel evolution of domesticated *Caenorhabditis* species targets  
331 pheromone receptor genes. *Nature*. **477**, 321–325 (2011).
- 332 3. A. K. Greenwood, A. R. Wark, K. Yoshida, C. L. Peichel, Genetic and neural modularity  
333 underlie the evolution of schooling behavior in threespine sticklebacks. *Curr. Biol.* **23**,  
334 1884–1888 (2013).
- 335 4. J. Shorter *et al.*, Genetic architecture of natural variation in *Drosophila melanogaster*  
336 aggressive behavior. *Proc. Natl. Acad. Sci. U. S. A.* **112**, E3555–E3563 (2015).
- 337 5. Y. Ding, A. Berrocal, T. Morita, K. D. Longden, D. L. Stern, Natural courtship song  
338 variation caused by an intronic retroelement in an ion channel gene. *Nature*. **536**, 329–  
339 332 (2016).
- 340 6. A. Bendesky *et al.*, The genetic basis of parental care evolution in monogamous mice.  
341 *Nature*. **544**, 434–439 (2017).
- 342 7. N. Niepoth, A. Bendesky, How Natural Genetic Variation Shapes Behavior. *Annu. Rev.*  
343 *Genomics Hum. Genet.* **21**, 437–463 (2020).
- 344 8. J. B. S. Haldane, Some Principles of Causal Analysis in Genetics. *Erkenntnis*. **6**, 346–  
345 357 (1936).
- 346 9. F. Nottebohm, T. M. Stokes, C. M. Leonard, Central control of song in the canary,  
347 *Serinus canarius*. *J. Comp. Neurol.* **165**, 457–486 (1976).
- 348 10. P. J. B. Slater, The cultural transmission of bird song. *Trends Ecol. Evol.* **1**, 94–97  
349 (1986).
- 350 11. A. J. Doupe, P. K. Kuhl, Birdsong and human speech: common themes and  
351 mechanisms. *Annu. Rev. Neurosci.* **22**, 567–631 (1999).
- 352 12. A. Nieder, R. Mooney, The neurobiology of innate, volitional and learned vocalizations  
353 in mammals and birds. *Philos. Trans. R. Soc. B Biol. Sci.* **375** (2020),  
354 doi:10.1098/rstb.2019.0054.
- 355 13. G. Laurent, On the value of model diversity in neuroscience. *Nat. Rev. Neurosci.*,  
356 doi:10.1038/s41583-020-0323-1.



- 357 14. J. Podos, A Performance Constraint on the Evolution of Trilled Vocalizations in a  
358 Songbird Family (Passeriformes: Emberizidae). *Evolution*. **51**, 537 (1997).
- 359 15. M. D. Mauk, D. V. Buonomano, The Neural Basis of Temporal Processing. *Annu. Rev.*  
360 *Neurosci.* **27**, 307–340 (2004).
- 361 16. J. F. Prather, S. Nowicki, R. C. Anderson, S. Peters, R. Mooney, Neural correlates of  
362 categorical perception in learned vocal communication. *Nat. Neurosci.* **12**, 221–228  
363 (2009).
- 364 17. J. Byers, E. Hebets, J. Podos, Female mate choice based upon male motor  
365 performance. *Anim. Behav.* **79**, 771–778 (2010).
- 366 18. D. C. Lahti, D. L. Moseley, J. Podos, A Tradeoff Between Performance and Accuracy in  
367 Bird Song Learning. *Ethology*. **117**, 802–811 (2011).
- 368 19. D. Deutsch, J. Clemens, S. Y. Thiberge, G. Guan, M. Murthy, Shared Song Detector  
369 Neurons in Drosophila Male and Female Brains Drive Sex-Specific Behaviors. *Curr.*  
370 *Biol.* **29**, 3200-3215.e5 (2019).
- 371 20. J. L. Dunning, S. Pant, K. Murphy, J. F. Prather, Female finches prefer courtship signals  
372 indicating male vigor and neuromuscular ability. *PLoS One*. **15**, e0226580 (2020).
- 373 21. M. Konishi, The Role of Auditory Feedback in the Control of Vocalization in the White-  
374 Crowned Sparrow. *Z. Tierpsychol.* **22**, 770–783 (1965).
- 375 22. P. Marler, S. Peters, Selective vocal learning in a sparrow. *Science*. **198**, 519–21  
376 (1977).
- 377 23. P. C. Munding, Behaviour-genetic analysis of canary song: inter-strain differences in  
378 sensory learning, and epigenetic rules. *Anim. Behav.* **50**, 1491–1511 (1995).
- 379 24. J. Podos, S. Nowicki, S. Peters, Permissiveness in the learning and development of  
380 song syntax in swamp sparrows. *Anim. Behav.* **58**, 93–103 (1999).
- 381 25. T. J. Gardner, F. Naef, F. Nottebohm, Freedom and rules: the acquisition and  
382 reprogramming of a bird's learned song. *Science*. **308**, 1046–9 (2005).
- 383 26. O. Fehér, H. Wang, S. Saar, P. P. Mitra, O. Tchernichovski, De novo establishment of  
384 wild-type song culture in the zebra finch. *Nature*. **459**, 564–568 (2009).
- 385 27. A. L. Lansverk *et al.*, The variability of song variability in zebra finch ( *Taeniopygia*  
386 *guttata* ) populations. *R. Soc. Open Sci.* **6**, 190273 (2019).
- 387 28. D. G. Mets, M. S. Brainard, Learning is enhanced by tailoring instruction to individual  
388 genetic differences. *eLife*. **8** (2019), doi:10.7554/eLife.47216.

- 389 29. D. G. Mets, M. S. Brainard, Genetic variation interacts with experience to determine  
390 interindividual differences in learned song. *Proc. Natl. Acad. Sci. U. S. A.* **115**, 421–426  
391 (2018).
- 392 30. Z. Chi, D. Margoliash, Temporal precision and temporal drift in brain and behavior of  
393 zebra finch song. *Neuron.* **32**, 899–910 (2001).
- 394 31. R. H. R. Hahnloser, A. A. Kozhevnikov, M. S. Fee, An ultra-sparse code underlies the  
395 generation of neural sequences in a songbird. *Nature.* **419**, 65–70 (2002).
- 396 32. M. A. Long, M. S. Fee, Using temperature to analyse temporal dynamics in the songbird  
397 motor pathway. *Nature.* **456**, 189–194 (2008).
- 398 33. J. H. Goldberg, M. S. Fee, A cortical motor nucleus drives the basal ganglia-recipient  
399 thalamus in singing birds. *Nat. Neurosci.* **15**, 620–627 (2012).
- 400 34. M. S. Brainard, A. J. Doupe, Translating birdsong: songbirds as a model for basic and  
401 applied medical research. *Annu. Rev. Neurosci.* **36**, 489–517 (2013).
- 402 35. M. F. Schmidt, J. Martin Wild, The respiratory-vocal system of songbirds: anatomy,  
403 physiology, and neural control. *Prog. Brain Res.* **212**, 297–335 (2014).
- 404 36. J. E. Markowitz *et al.*, Mesoscopic patterns of neural activity support songbird cortical  
405 sequences. *PLoS Biol.* **13**, 1–20 (2015).
- 406 37. K. Hamaguchi, M. Tanaka, R. Mooney, A Distributed Recurrent Network Contributes to  
407 Temporally Precise Vocalizations. *Neuron.* **91**, 680–693 (2016).
- 408 38. Y. S. Zhang, J. D. Wittenbach, D. Z. Jin, A. A. Kozhevnikov, Temperature manipulation  
409 in songbird brain implicates the premotor nucleus HVC in birdsong syntax. *J. Neurosci.*  
410 **37**, 2600–2611 (2017).
- 411 39. R. Egger *et al.*, Local Axonal Conduction Shapes the Spatiotemporal Properties of  
412 Neural Sequences. *Cell.* **183**, 537–548.e12 (2020).
- 413 40. K. Hammond, J. W. James-R, Genes of Large Effect and the Shape of the Distribution  
414 of a Quantitative Character. *Aus. J. Biol. Sci.* **4**, 867–876 (1970).
- 415 41. M. Lynch, B. Walsh, *Genetics and analysis of quantitative traits* (Sinauer, 1998).
- 416 42. B. M. Colquitt, D. G. Mets, M. S. Brainard, Draft genome assembly of the Bengalese  
417 finch, *Lonchura striata domestica*, a model for motor skill variability and learning.  
418 *Gigascience.* **7**, 1–6 (2018).
- 419 43. R. S. Spielman, R. E. McGinnis, W. J. Ewens, Transmission test for linkage  
420 disequilibrium: The insulin gene region and insulin-dependent diabetes mellitus (IDDM).  
421 *Am. J. Hum. Genet.* **52**, 506–516 (1993).

- 422 44. M. M. Xiong, J. Krushkal, E. Boerwinkle, TDT statistics for mapping quantitative trait  
423 loci. *Ann. Hum. Genet.* **62**, 431–452 (1998).
- 424 45. Y. Yu *et al.*, Characterization of the GufA subfamily member SLC39A11/Zip11 as a zinc  
425 transporter. *J. Nutr. Biochem.* **24**, 1697–1708 (2013).
- 426 46. R. J. Cousins *et al.*, Gastric and colonic zinc transporter ZIP11 (Slc39a11) in mice  
427 responds to dietary zinc and exhibits nuclear localization. *J. Nutr.* **143**, 1882–1888  
428 (2013).
- 429 47. J. Jeong, D. J. Eide, The SLC39 family of zinc transporters. *Mol. Aspects Med.* **34**,  
430 612–619 (2013).
- 431 48. L. J. Blakemore, P. Q. Trombley, Zinc as a neuromodulator in the central nervous  
432 system with a focus on the olfactory bulb. *Front. Cell. Neurosci.* **11** (2017),  
433 doi:10.3389/fncel.2017.00297.
- 434 49. G. A. Howell, M. G. Welch, C. J. Frederickson, Stimulation-induced uptake and release  
435 of zinc in hippocampal slices. *Nature.* **308**, 736–738 (1984).
- 436 50. C. M. Montagnese, F. A. Geneser, J. R. Krebs, Histochemical distribution of zinc in the  
437 brain of the zebra finch (*Taenopygia guttata*). *Anat. Embryol. (Berl.)* **188**, 173–187  
438 (1993).
- 439 51. C. E. Brown, R. H. Dyck, Distribution of zincergic neurons in the mouse forebrain. *J.*  
440 *Comp. Neurol.* **479**, 156–167 (2004).
- 441 52. E. P. Huang, Metal ions and synaptic transmission: Think zinc. *Proc. Natl. Acad. Sci. U.*  
442 *S. A.* **94**, 13386–13387 (1997).
- 443 53. K. Vogt, J. Mellor, G. Tong, R. Nicoll, The Actions of Synaptically Released Zinc at  
444 Hippocampal Mossy Fiber Synapses. *Neuron.* **26**, 187–196 (2000).
- 445 54. A. M. Vergnano *et al.*, Zinc Dynamics and Action at Excitatory Synapses. *Neuron.* **82**,  
446 1101–1114 (2014).
- 447 55. C. T. Anderson *et al.*, Modulation of extrasynaptic NMDA receptors by synaptic and  
448 tonic zinc. *Proc. Natl. Acad. Sci. U. S. A.* **112**, E2705–E2714 (2015).
- 449 56. B. I. Kalappa, C. T. Anderson, J. M. Goldberg, S. J. Lippard, T. Tzounopoulos, AMPA  
450 receptor inhibition by synaptically released zinc. *Proc. Natl. Acad. Sci. U. S. A.* **112**,  
451 15749–15754 (2015).
- 452 57. A. Joshi *et al.*, Cell-Specific Activity-Dependent Fractionation of Layer 2/3 >5B  
453 Excitatory Signaling in Mouse Auditory Cortex. *J. Neurosci.* **35**, 3112–3123 (2015).

- 454 58. R. Mooney, J. F. Prather, The HVC microcircuit: The synaptic basis for interactions  
455 between song motor and vocal plasticity pathways. *J. Neurosci.* **25**, 1952–1964 (2005).
- 456 59. G. Kosche, D. Vallentin, M. A. Long, Interplay of inhibition and excitation shapes a  
457 premotor neural sequence. *J. Neurosci.* **35**, 1217–1227 (2015).
- 458 60. J. Kornfeld *et al.*, EM connectomics reveals axonal target variation in a sequence-  
459 generating network. *eLife.* **6** (2017), doi:10.7554/eLife.24364.
- 460 61. Y. B. Nitzan *et al.*, Cloiquinol effects on tissue chelatable zinc in mice. *J. Mol. Med.* **81**,  
461 637–644 (2003).
- 462 62. S. M. Elbashir *et al.*, Duplexes of 21-nucleotide RNAs mediate RNA interference in  
463 cultured mammalian cells. *Nature.* **411**, 494–498 (2001).
- 464 63. H. Kagawa *et al.*, Ecological correlates of song complexity in white-rumped munias.  
465 *Interact. Stud. Soc. Behav. Commun. Biol. Artif. Syst. Stud. / Soc. Behav. Commun.*  
466 *Biol. Artif. Syst. Stud.* **13**, 263–284 (2012).
- 467 64. C. T. Anderson, M. Kumar, S. Xiong, T. Tzounopoulos, Cell-specific gain modulation by  
468 synaptically released zinc in cortical circuits of audition. *eLife.* **6**, 1–20 (2017).
- 469 65. M. Lou Guerinot, The ZIP family of metal transporters. *Biochim. Biophys. Acta -*  
470 *Biomembr.* **1465**, 190–198 (2000).
- 471 66. G. Davies *et al.*, Study of 300,486 individuals identifies 148 independent genetic loci  
472 influencing general cognitive function. *Nat. Commun.* **9** (2018), doi:10.1038/s41467-  
473 018-04362-x.
- 474 67. T. F. Roberts, S. M. H. Gobes, M. Murugan, B. P. Ölveczky, R. Mooney, Motor circuits  
475 are required to encode a sensory model for imitative learning. *Nat. Neurosci.* **15**, 1454–  
476 1459 (2012).
- 477 68. W. Zhao, F. Garcia-Oscos, D. Dinh, T. F. Roberts, Inception of memories that guide  
478 vocal learning in the songbird. *Science.* **366**, 83–89 (2019).
- 479 69. P. Marler, A comparative approach to vocal learning: Song development in white-  
480 crowned sparrows. *J. Comp. Physiol. Psychol.* **71**, 1–25 (1970).
- 481 70. J. Soha, The auditory template hypothesis: a review and comparative perspective.  
482 *Anim. Behav.* **124**, 247–254 (2017).
- 483 71. J. A. Soha, P. Marler, A species-specific acoustic cue for selective song learning in the  
484 white-crowned sparrow. *Anim. Behav.* **60**, 297–306 (2000).
- 485 72. D. A. Nelson, A preference for own-subspecies' song guides vocal learning in a song  
486 bird. *Proc. Natl. Acad. Sci. U. S. A.* **97**, 13348–13353 (2000).

- 487 73. M. Rabinovich, R. Huerta, G. Laurent, Transient Dynamics for Neural Processing. *New*  
488 *Ser.* **321**, 48–50 (2008).
- 489 74. K. E. Bouchard, M. S. Brainard, Auditory-induced neural dynamics in sensory-motor  
490 circuitry predict learned temporal and sequential statistics of birdsong. *Proc. Natl. Acad.*  
491 *Sci. U. S. A.* **113**, 9641–9646 (2016).
- 492 75. D. A. Nelson, A preference for own-subspecies' song guides vocal learning in a song  
493 bird. *Proc. Natl. Acad. Sci. U. S. A.* **97**, 13348–13353 (2000).
- 494 76. P. C. Munding, D. C. Lahti, Quantitative integration of genetic factors in the learning  
495 and production of canary song. *Proc. R. Soc. B Biol. Sci.* **281** (2014),  
496 doi:10.1098/rspb.2013.2631.
- 497 77. A. F. G. Bourke, Hamilton's rule and the causes of social evolution. *Philos. Trans. R.*  
498 *Soc. B Biol. Sci.* **369** (2014), doi:10.1098/rstb.2013.0362.
- 499 78. A. E. Leedale *et al.*, Cost, risk, and avoidance of inbreeding in a cooperatively breeding  
500 bird. *Proc. Natl. Acad. Sci. U. S. A.* **117**, 15724–15730 (2020).
- 501 79. E. Lieberman-Aiden *et al.*, Comprehensive mapping of long-range interactions reveals  
502 folding principles of the human genome. *Science.* **326**, 289–293 (2009).
- 503 80. B. K. Peterson, J. N. Weber, E. H. Kay, H. S. Fisher, H. E. Hoekstra, Double Digest  
504 RADseq: An Inexpensive Method for De Novo SNP Discovery and Genotyping in Model  
505 and Non-Model Species. *PLoS One.* **7**, e37135 (2012).
- 506 81. H. Li, Aligning sequence reads, clone sequences and assembly contigs with BWA-MEM  
507 (2013) (available at <http://arxiv.org/abs/1303.3997>).
- 508 82. H. Li, R. Durbin, Fast and accurate short read alignment with Burrows-Wheeler  
509 transform. *Bioinformatics.* **25**, 1754–1760 (2009).
- 510 83. A. McKenna *et al.*, The genome analysis toolkit: A MapReduce framework for analyzing  
511 next-generation DNA sequencing data. *Genome Res.* **20**, 1297–1303 (2010).
- 512 84. S. Zhang, Q. Sha, H. S. Chen, J. Dong, R. Jiang, Transmission/disequilibrium test  
513 based on haplotype sharing for tightly linked markers. *Am. J. Hum. Genet.* **73**, 566–579  
514 (2003).
- 515 85. E. M. M. Manders, F. J. Verbeek, J. A. Aten, Measurement of co-localization of objects  
516 in dual-colour confocal images. *J. Microsc.* **169**, 375–382 (1993).
- 517 86. J. Kosubek-Langer, L. Schulze, C. Scharff, Maturation, behavioral activation, and  
518 connectivity of adult-born medium spiny neurons in a striatal song nucleus. *Front.*  
519 *Neurosci.* **11**, 323 (2017).  
520



521

522 **Acknowledgements:**

523 The authors thank A. Karpova, D. Manoli, E. Merfeld, M. Scanziani, and J. Willsey for discus-  
524 sions and comments on the manuscript.

525

526 **Funding:**

527 Howard Hughes Medical Institute (MSB)

528 Program for Breakthrough Biomedical Research award from the Sandler Family Foundation  
529 (MSB)

530 The Jane Coffin Childs Fund for Medical Research (DGM)

531

532 **Author contributions:**

533 Conceptualization: DGM, MSB

534 Methodology: DGM, WHM, BMC

535 Investigation: DGM, WHM, BMC

536 Writing-original draft: DGM, MSB

537 Writing-review & editing: DGM,WHM,BMC,MSB

538

539 **Competing interests:**

540 Authors declare that they have no competing interests.

541

542 **Data and materials availability:**

543 All data are available in the main text or the supplementary materials.

544

545 **Supplementary Materials**

546 Materials and Methods

547 Figs. S1 to S4

548 Tables S1 to S4

549 Data S1



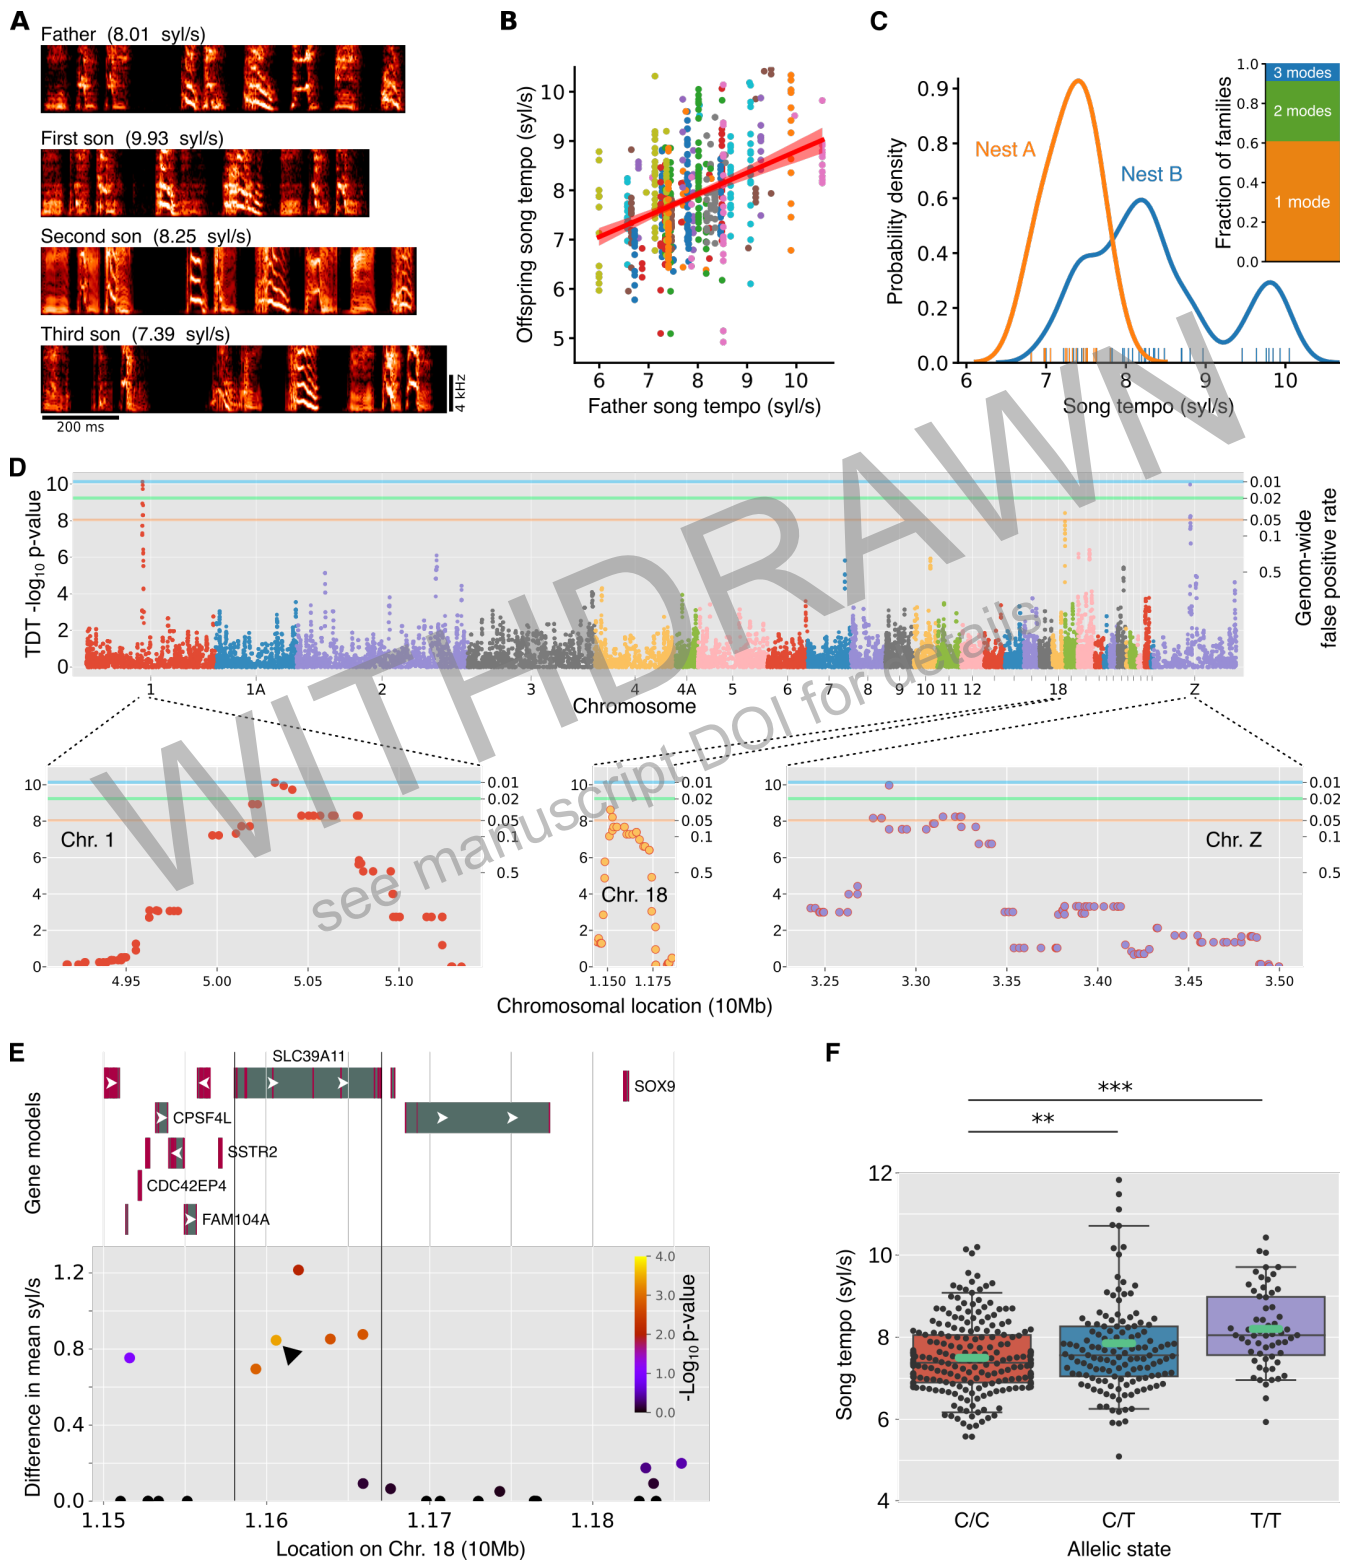

551

552 **Fig. 1. Genetic mapping identifies genomic regions influencing song tempo.**

553 (A) Example songs from a father (top) and three of his sons (bottom). The sons  
554 produced copies of their father's song that were generally similar in multiple features,  
555 including the repertoire of discrete syllables, their ordering, and the tempo at which they were  
556 produced, but there was also variation in these features across individuals. (B) Relationship  
557 between the tempo of the father's song and the tempo of songs produced by his offspring ( $n =$   
558  $572$  offspring from  $54$  fathers/nests,  $r = 0.39$ , slope =  $0.43$ ,  $P < 0.0001$ ). The significant  
559 correlation across families reflects the potential influence of both the father's tutor song, and  
560 his transmitted genes. The variation within families (vertically aligned points), despite the  
561 same tutor, could reflect individual differences in transmitted genes that affect tempo. (C)  
562 Probability distribution of tempo for two families, one with a single mode (orange) and a  
563 second with multiple modes (blue). More than one mode was present in  $\sim 40\%$  of families and  
564 is consistent with segregating genes of large effect (right, number of modes determined by  
565 the minimum Bayesian information criterion from Gaussian mixture model fits). (D) Genome  
566 wide scan for linkage between molecular-genetic markers and song tempo. Left Y axis  
567 indicates the p-value of the TDT test statistic calculated for each sliding window of  $20$   
568 markers. Right Y axis indicates permutation based genome-wide false positive rate.  
569 Expanded views of significant peaks are shown below ( $n = 509$  birds; colored lines indicate  
570 permutation based genome-wide significance thresholds of  $P = 0.05$  (orange),  $P = 0.02$   
571 (green), and  $P = 0.01$  (blue)). (E) Difference in mean tempo between allelic states for single  
572 markers (SNPs) on the right end of Chromosome 18 plotted against their genomic position.  
573 Significance is indicated by marker color. Gene models derived from genome annotation are  
574 indicated at top. Arrows indicate coding direction. Introns are shown in green, exons are  
575 shown in purple. Black arrow indicates marker shown in F. (F) Distribution of song tempos for  
576 birds of each of three allelic states (C/C, C/T, T/T) found at nucleotide  $11605768$  on  
577 Chromosome 18. Birds with T/T sang significantly faster than birds with C/C (two tailed  $t$ -test;  
578  $** P < 0.02$ ;  $*** P < 0.0001$ ) consistent with linkage between allelic state at this location and  
579 tempo. Means indicated by cyan bars. Box shows median and inner quartiles and whiskers  
580 show  $5^{\text{th}}$  and  $95^{\text{th}}$  percentiles.

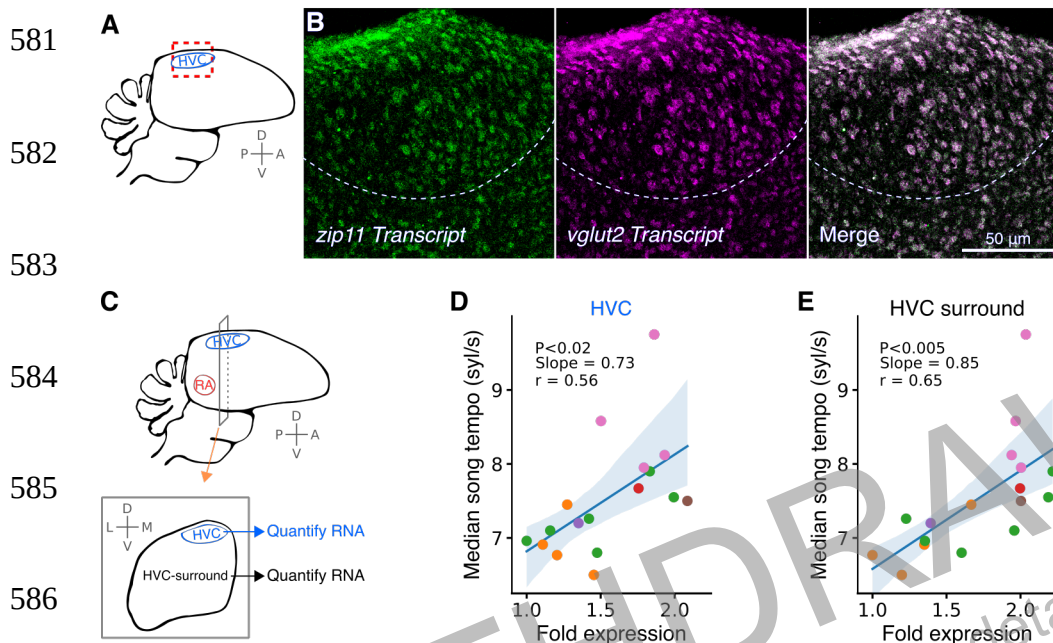

590 **Fig. 2. *zip11* mRNA transcript levels in HVC correlate with song tempo.**

591 A) Sagittal section illustrating the brain area imaged for *zip11* transcript (red). (B) Dual  
592 *In situ* mRNA hybridization to *zip11* (*SLC39A11*) transcript (left) and *vglut2* (*SLC17A6*)  
593 transcript (middle). The merge (right) reveals co-localization indicating that *zip11* is expressed  
594 in excitatory neurons in the avian forebrain. Dashed line indicates the boundary of HVC. (C)  
595 Schematic illustrating tissue separation used to assess transcript levels. We dissected  
596 coronal sections of forebrain tissue into samples containing the song premotor nucleus HVC  
597 (blue) and surrounding non-song brain tissue anterior to the song premotor nucleus RA  
598 (black, HVC-surround). *zip11* transcript levels for each region were determined by quantitative  
599 polymerase chain reaction. (D, E) Inter-individual differences in *zip11* transcript levels in HVC  
600 (D) and HVC-surround (E) were positively correlated with the song tempo of individual birds  
601 ( $n = 17$  birds from 6 nests; nests indicated by color). Fold expression changes are relative to  
602 the lowest expression level in the set. Parameters were fit by ordinary least squares.

603

604

605

606

607

608

609

610

611

612

613

614

615

616

617

618

619

620

621

622

623

624

625

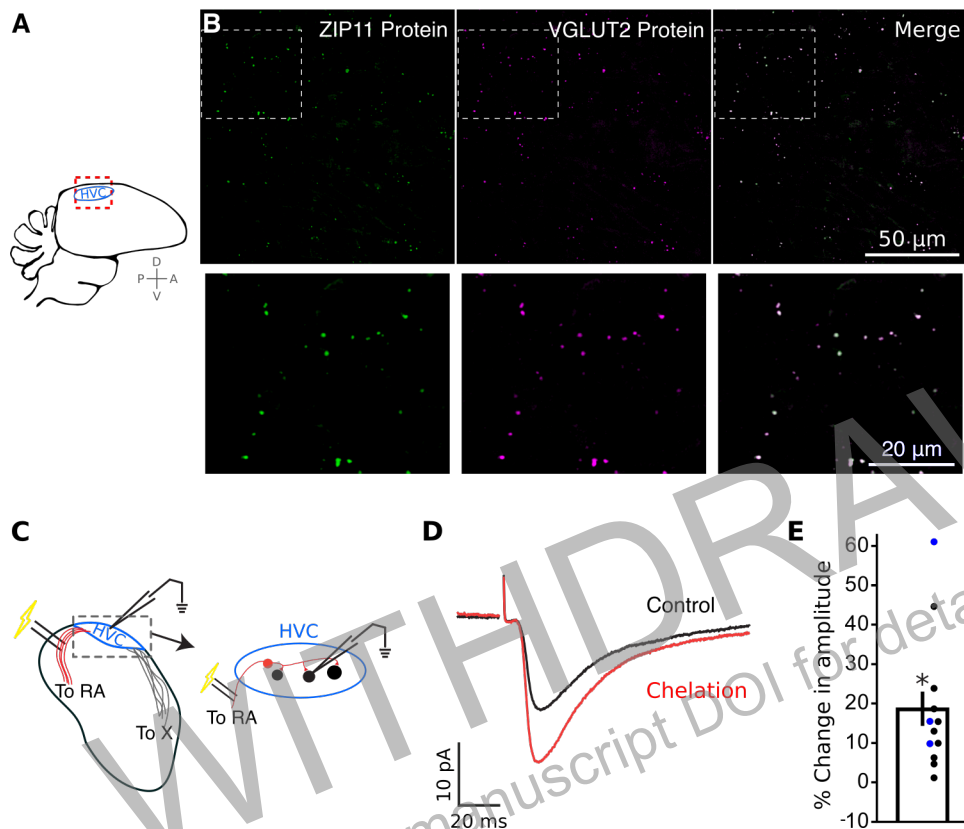

**Fig. 3. ZIP11 protein and soluble zinc are in a position to modulate song circuitry.**

(A) Sagittal section illustrating the brain area imaged for ZIP11 protein (red). (B) Antibody staining for ZIP11 protein in HVC. Anti-ZIP11 antibody staining is shown in green (left) and anti-VGLUT2 antibody staining (a marker for excitatory synapses) is shown in red (middle). The merged image (right) reveals co-localization between ZIP11 puncta and VGLUT2 puncta, indicating that ZIP11 is present at excitatory synapses. (C-E) Chelation of soluble zinc increased the strength of synaptic currents in HVC. (C) Schematic of *in vitro* slice preparation. HVC-RA neurons were stimulated via the efferent tract to RA, and elicited excitatory post-synaptic currents (EPSCs) were recorded in downstream neurons within HVC. Chelation of zinc increased the amplitude of EPSCs as illustrated for an individual experiment (D) and summarized across experiments (E, blue indicates ZX1, black indicates TPEN,  $18 \pm 5\%$  increase in peak amplitude,  $P < 0.005$ , paired *t*-test,  $n = 12$  experiments in 6 birds).

626

627

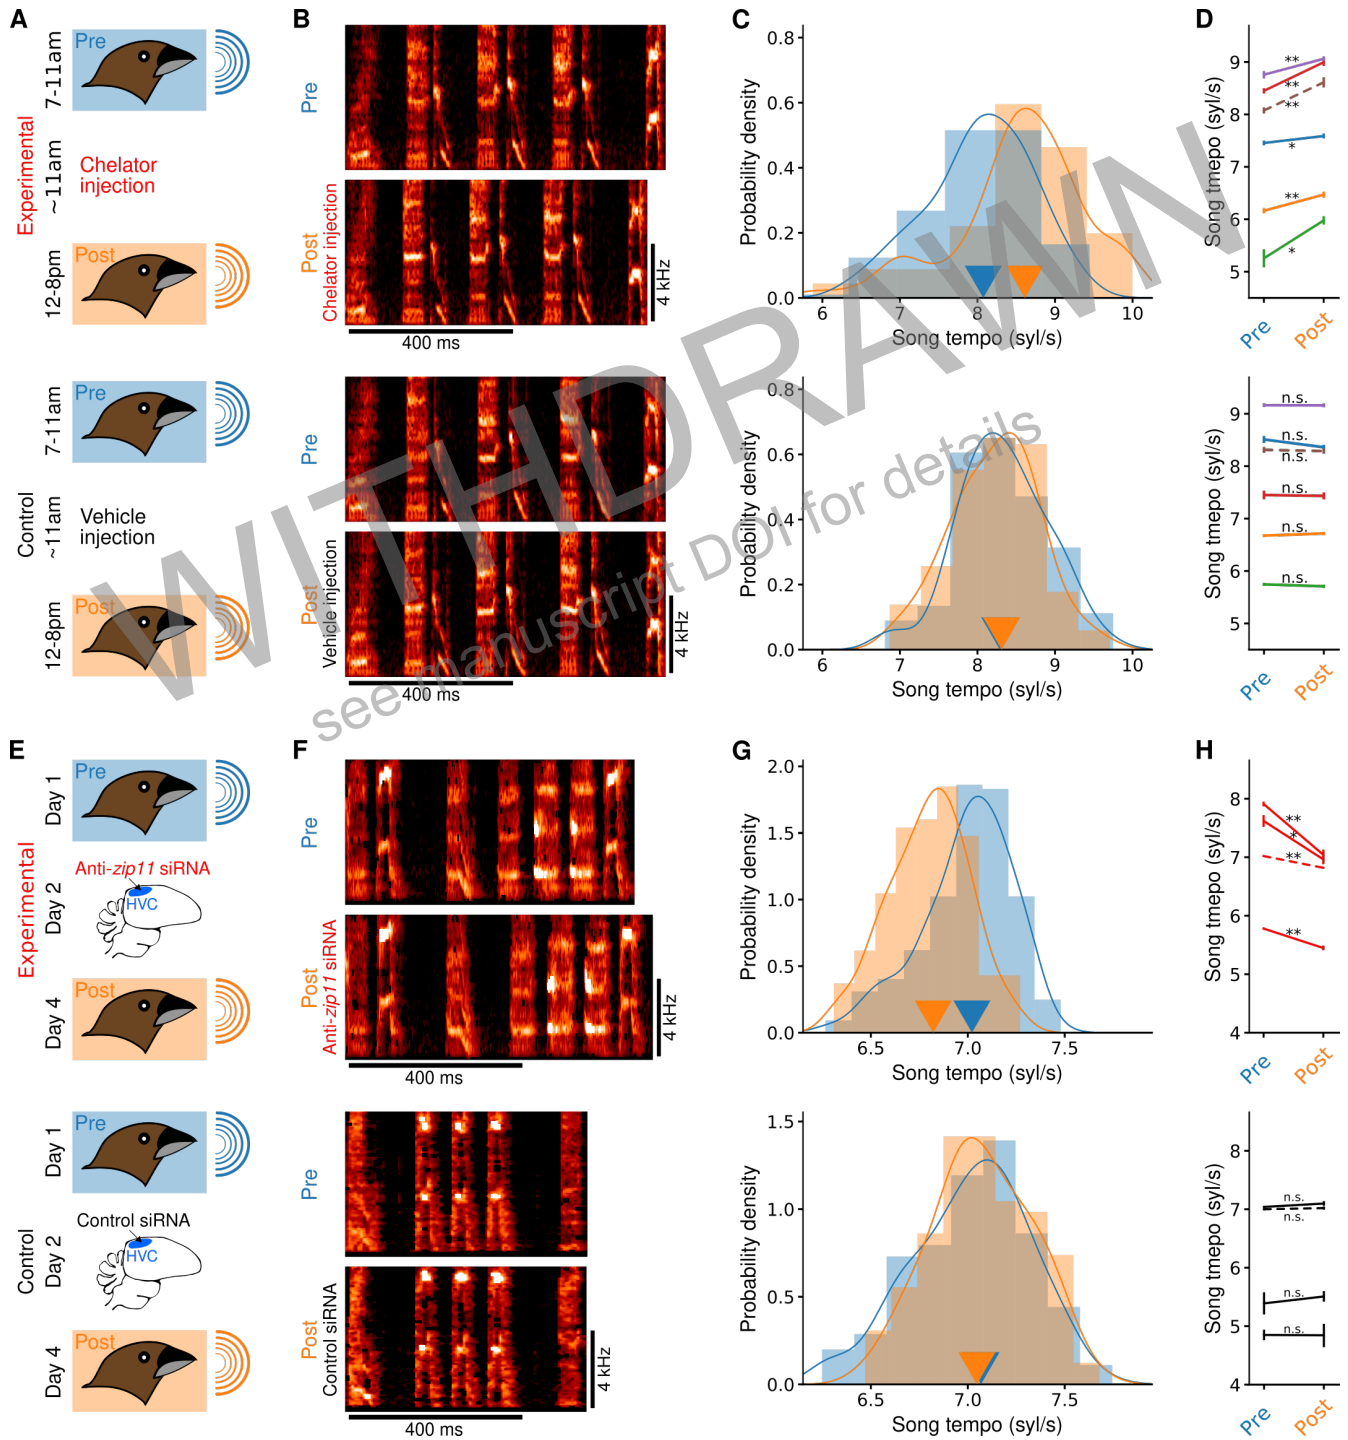

25



629 **Fig. 4. Manipulations of zinc and *zip11* levels *in vivo* alter song tempo.**

630 (A) Schematic of *in vivo* zinc chelation. In the experimental condition (top), songs were  
631 analyzed from blocks 'pre' (7-11am) and 'post' (12-8pm) injection of a solvent carrying the  
632 membrane-permeant zinc chelator Clioquinol (CQ). In the control condition (bottom), the  
633 same animals were injected with solvent alone. (B) Example songs produced by a bird before  
634 and after chelation (top) or control (bottom) manipulation, illustrating that the gross structure  
635 of song remained unchanged. (C) The median tempo for this bird increased from 8.08 syl/s  
636 'pre' (blue) to 8.61 syl/s 'post' (orange) zinc chelation. Arrows indicate medians. (D) Median  
637 song tempo for each bird pre and post experimental (top) and control (bottom) manipulations.  
638 For all birds, the chelator caused a significant increase in song tempo ( $n = 6$ ; \*  $P < 0.02$ ; \*\*  $P$   
639  $< 0.002$ , corrected Mood's median test). In contrast, vehicle injection did not affect tempo ( $n =$   
640  $6$ , n.s. denotes  $P > 0.1$ , Mood's median test). Colors of paired data correspond to individual  
641 birds. (E) Schematic of experimental design for ZIP11 knockdown. For the experimental  
642 group (top), all songs from day 1 were analyzed as the 'pre' condition. On day 2, HVC was  
643 injected bilaterally with anti-*zip11* siRNA. All songs recorded during the first full day of singing  
644 following injection (day 4 in all cases) were analyzed as the 'post' condition. For the control  
645 group (bottom) treatment was identical except that the siRNA targeted no known Bengalese  
646 finch mRNA. (F) Examples of songs produced by two brothers pre and post siRNA injection.  
647 For both birds, there was little change to song spectral content. (G) Distribution of song  
648 tempos for the same pair of birds before (blue) and after (orange) manipulation. Tempo was  
649 slower following injection of anti-*zip11* siRNA (top) but unchanged following injection of  
650 control siRNA (bottom). Arrows indicate medians. (H) Median song tempos pre and post  
651 injection for 4 pairs of brothers. For each pair, one was injected with anti-*zip11* siRNA (top,  $P$   
652  $< 0.002$ ) while the other was injected with control siRNA (bottom). All animals injected with  
653 anti-*zip11* siRNA sang significantly slower following siRNA injection (\*  $P < 0.02$ , \*\*  $P < 0.002$ ,  
654 Mood's median test). Tempo was unchanged by control siRNA (bottom; n.s. denotes  $P > 0.1$ ,  
655 Mood's median test). Dashed lines indicate data from the example birds.



## 656 **Methods**

657

### 658 **Subjects**

659 Subjects were male and female Bengalese finches (*Lonchura striata domestica*) bred  
660 in our colony. They were reared and tutored by their genetic parents to the age of  
661 independence. Other than efforts to maintain separation between lineages in order to  
662 minimize inbreeding, mating pairs were randomly selected male and female birds. The initial  
663 phenotypic analysis (Fig. 1A-1C) used data from 626 male birds and the subsequent linkage  
664 analysis used data from 509 birds from families for which we were able to collect DNA  
665 markers for male offspring and one or both parents (see below). The Institutional Animal Care  
666 and Use Committee at the University of California, San Francisco, approved all protocols.

### 667 **Audio recording**

668 Vocalizations were digitized at 32 kHz from singly housed birds in sound isolation  
669 chambers (Acoustic Systems). Microphones were in a fixed position at the top of the cage  
670 housing the bird. Prior to analysis, songs were high pass filtered to capture sound above  
671 ~500 Hz. Filters were digitally implemented elliptical infinite impulse response with a  
672 passband edge frequency of 0.04 radians. All birds were recorded during early adulthood (90-  
673 120 days post-hatch).

### 674 **Calculation of song tempo**

675 Song tempo was quantified as the average number of syllables produced per second  
676 of song, a measure previously shown to be heritable (29). Within song, syllables were defined  
677 as discrete units of sound separated by silence. Amplitude traces were created by rectifying  
678 the filtered song waveform and convolving with a 2 ms square wave. Heuristic thresholds

679 were set automatically as three times the 10th percentile of values in the amplitude trace. We  
680 then identified 'objects' as uninterrupted sounds louder than the threshold and longer than  
681 10ms. We merged any objects separated by silence that was less than 5ms. These final  
682 merged objects we defined as 'syllables.' This approach reliably identified syllable onsets and  
683 offsets corresponding with those identified by human evaluation. A series of syllables that had  
684 no gaps longer than 250ms was considered a song. For each song, tempo was then  
685 quantified as the number of syllables present in a given song divided by the duration of that  
686 song in ms. For each bird, all summary statistics were derived from at least 60 song  
687 renditions.

### 688 **Chromosome level genome assembly**

689 To generate contiguous DNA sequences that span the length of chromosomes, we  
690 combined data from an earlier draft genome assembly of the Bengalese finch genome  
691 (42) with newly collected data designed to capture local chromosomal architecture.  
692 Specifically, we used sequence data from Hi-C (79) libraries created by Dovetail Genomics  
693 using blood samples we provided. These libraries were sequenced to ~250x coverage using  
694 the Illumina HiSeq 4000 platform. This sequence data was then combined with the previous  
695 assembly using the Dovetail HiRise assembler. This resulted in a genome assembly with a  
696 total length of ~1.06Gb and a total of 2014 scaffolds (RefSeq assembly accession number  
697 GCF\_005870125.1). The largest 31 scaffolds correspond to Chromosomes 1-15, 17-29 and Z  
698 in the Chicken reference genome and additionally to Chromosomes 1a and 4a in the zebra  
699 finch reference genome, that were previously created using Sanger sequence data. Together  
700 they account for ~97% of the total assembled DNA (National Center for Biotechnology  
701 Information BioProject PRJNA369279).

### 702 **Genetic marker typing**

703 We collected molecular-genetic marker data from each of 509 Bengalese finches used  
704 for linkage analysis. These markers were a modified form of Double Digest Restriction  
705 Associated DNA (ddRAD) (80) markers we call Single End RAD markers (seRAD). From  
706 each bird, purified genomic DNA was digested with the non-palindromic restriction enzyme  
707 BssS1 (NEB) and the 4 base restriction enzyme Mse1 (NEB) under standard double digest  
708 conditions. Digested DNA was purified using the AmpureXP system, ligated (T4 DNA ligase,  
709 NEB) to appropriate double stranded linker oligonucleotides (Table S1), then amplified in a 10  
710 cycle PCR reaction using primers that contain an 8bp Illumina i7 compatible barcode and are  
711 specific for ligated products that reform the BssS1 and TA sites (Table S1 and S2). Amplified  
712 libraries were pooled according to DNA concentration, and size selected (200-500bp) using  
713 the BluePippin (Sage Science) system. For each locus digested with the BssS1 enzyme, one  
714 of the two ends was sequenced using a custom primer that was specific to one end of the  
715 BssS1 cut site and required correct ligation of that site and the appropriate linker (Table S1).  
716 For sequencing, 48 samples were multiplexed using the Illumina barcoding system (Table  
717 S2). All sequencing was single end 50 or 65 base pairs and performed on the Illumina  
718 HiSeq4000 platform. Sequences passing Illumina quality thresholds were then aligned to the  
719 Bengalese finch genome (RefSeq GCF\_005870125.1) using the MEM algorithm (81) from the  
720 Burrows-Wheeler Aligner software package (82). Across the population of birds, there were  
721 ~400,000 distinct genomic loci associated with restriction enzyme cleavage, for each of which  
722 50-65 base pairs were sequenced. Of these, 50,999 loci were identified as potentially  
723 informative because they both contained single nucleotide polymorphisms that could serve as  
724 markers for transmission of alleles from parents to offspring, and they were sequenced with  
725 high coverage in at least 200 individuals. For each individual, the diploid allelic state at each  
726 of these informative loci was predicted using the Bayesian framework described in McKenna  
727 et al. (83). These estimates of diploid allelic state were then used for all subsequent analyses.  
728 Across the 509 birds used for genetic mapping, each bird was unambiguously assigned a  
729 diploid allelic state at an average of  $39,996 \pm 221$  and a median of 40,827 loci. This  
730 corresponds to a marker for allelic state approximately every 25 kilobases across the  
731 genome. Each locus was unambiguously assigned a diploid allelic state in an average of  $399$   
732  $\pm 0.63$  and a median of 473 birds.

## 733 Genetic mapping

734 To establish linkage between regions of the genome and song tempo we used an  
735 extension of the Transmission Disequilibrium Test (TDT) appropriate for quantitative  
736 phenotypes and able to utilize multiple individuals for each family (44). The TDT is a test for  
737 genetic linkage and association in outbred populations with known familial structure and  
738 uncontrolled breeding (43). The TDT statistic at any given locus is calculated only from  
739 families with segregation of allelic state at that genomic location and is thus robust to  
740 population stratification and missing marker data. In our analysis, we only included genomic  
741 locations that, across the entire population, had two (e.g. C/T and C/C) or three (e.g. C/T,  
742 C/C, T/T) allelic states comprised of two nucleotides. Where there were three allelic states,  
743 the two homozygous states (e.g. C/C and T/T) were used to calculate the TDT as these are  
744 the two states where the identities of the parents transmitting the alleles is unambiguous. TDT  
745 scores at individual polymorphic locations can be combined to assess the linkage between a  
746 larger genomic region and a phenotype (84). As each single polymorphic location uses only a  
747 subset of individuals from the population, we increased the number of individuals contributing  
748 to linkage between tempo and a larger genomic region by combining TDT statistics in sliding  
749 windows of 20 markers. The TDT is chi-square distributed and p-values for each 20 marker  
750 block were determined from a chi-square distribution with 20 degrees of freedom. This  
751 analysis was conducted genome-wide (across 50,999 single loci) on a multi-generational  
752 population of 509 (481 males and 28 females) birds where there were 105 unique parental  
753 pairs and a median of 4.88 and a maximum of 22 male offspring. Genetic data from all male  
754 offspring and (when available) their male and female parents comprised this set.

755 As both family overlap and genetic linkage between nearby markers may create non-  
756 independence among our linkage scores, a genome-wide significance threshold for this  
757 analysis was established by permutation test. For each of 10,000 permutations, phenotypes  
758 were shuffled relative to genotypes and the entire analysis was re-run. The maximum  $-\log_{10} P$   
759 value from each analysis was retained. This set of scores then established a distribution from

760 which significance thresholds were derived. We note that the significance values determined  
761 by such permutation testing are conservative relative to those derived by a simple  
762 combination of TDT statistic values.

### 763 **Fluorescent *in situ* hybridization**

764 Fluorescent *in situ* hybridization (FISH) was performed using the hybridization chain  
765 reaction system from Molecular Instruments. Birds were euthanized with isoflurane,  
766 decapitated, and debrained. Brains were flash-frozen in -70°C dry ice-chilled isopentane for  
767 12 seconds within 4 minutes of decapitation, then stored at -80°C. Fresh-frozen brains were  
768 cryosectioned at 16 µm onto SuperFrost Plus slides (Fisher), chilled in the cryo-chamber,  
769 then melted onto the slide using a warmed metal dowel. Slides were transferred to -80°C for  
770 storage. For FISH, slides were transferred from -80°C to slide mailers containing cold 4%  
771 formaldehyde and incubated for 15 minutes on ice. After fixation, slides were washed three  
772 times for 5 minutes using DEPC-treated PBS + 0.1% TWEEN 20 (PBST), dehydrated in 50%,  
773 70%, and two rounds of 100% ethanol for 3-5 minutes each round, then dried in air. Slides  
774 were then acetylated for 10 minutes (1.3% triethanolamine, 0.021 N HCl, 0.25% acetic  
775 anhydride) and washed in DEPC-PBST for 10 min. Slides were dehydrated again and  
776 transferred to a SlideMoat (Boekel Scientific) at 37°C. 100 µL of v3 Hybridization Buffer  
777 (Molecular Instruments) was added to each slide, which was then coverslipped and incubated  
778 for 10 minutes at 37°C. Meanwhile, 2 nM of each mRNA transcript specific probe was added  
779 to 100 µL Hybridization Buffer and denatured at 37°C. Pre-hybridization buffer was removed,  
780 100 µL of probe/buffer was added, slides were coverslipped and incubated overnight at 37°C.  
781 The next day, coverslips were floated off in Probe Wash Buffer (PWB, 50% formamide, 5x  
782 SSC, 9 mM citric acid pH 6.0, 0.1% TWEEN 20, 50 µg/ml heparin), then washed in 75%  
783 PWB/25% SSCT (5x SSC, 0.1% TWEEN 20), 50% PWB/50% SSCT, 25% PWB/75% SSCT,  
784 100% SSCT for 15 minutes each at 37°C. This was followed by 5 minutes at room  
785 temperature in SSCT. Slides were incubated in 200 µL of Amplification Buffer (provided by  
786 company) for 30 minutes at room temperature. Alexa fluor-conjugated DNA hairpins were

787 denatured for 90 seconds at 95°C then allowed to cool for at least 30 minutes in the dark at  
788 room temperature. Hairpins were added to 100 ul amplification buffer, applied to slides, and  
789 incubated overnight at room temperature. The following day, slides were washed in SSCT  
790 containing 1 ng/mL DAPI for 30 minutes at room temperature, then SSCT for 30 minutes at  
791 room temperature, followed by a final 5 minutes in SSCT at room temperature. Prolong Glass  
792 Antifade Medium (Thermofisher) was added to each slide, which was then coverslipped.  
793 Images were acquired using confocal microscopy. The degree of co-localization between  
794 objects was evaluated using Mander's co-localization coefficients (85).

### 795 **Immunofluorescent staining**

796 To prepare tissue for staining, birds were deeply anesthetized with isoflurane before  
797 being transcardially perfused with 0.9% saline, followed by 3.7% formaldehyde in 0.025 M  
798 phosphate buffer. Brains were postfixed for 4–24 h in 3.7% formaldehyde, then cryoprotected  
799 in 30% sucrose. Forty micrometer thick sagittal sections were cut on a freezing microtome  
800 and stored in phosphate-buffered saline (PBS; 137 mM NaCl, 2.7 mM KCl, 8 mM Na<sub>2</sub>HPO<sub>4</sub>,  
801 and 2 mM KH<sub>2</sub>PO<sub>4</sub>) at 4°C. For immunofluorescence, sections were washed 3 times for 10  
802 min each in PBS at room temperature. Sections were then incubated on a nutator, in clearing  
803 reagent, for one hour at room temperature. Clearing agent was either PBS+0.3%triton x-100  
804 (synaptic staining) or PBS+0.1% TWEEN 20 (*SLC39A11* staining alone). Sections were  
805 washed 3 times in PBS for 10 min each at room temperature and then transferred to PBS+2%  
806 goat serum and incubated for 2-4 hours at room temperature. Sections were transferred to  
807 fresh PBS+2% goat serum, and primary antibodies were added at a concentration of 1:500.  
808 Sections were incubated in primary antibody overnight at 4°C. The next morning, sections  
809 were washed 3 times for 10 min each in PBS at room temperature. Secondary antibodies  
810 were added at a concentration of 1:2000, and sections were incubated for 4 hours at room  
811 temperature. Following incubation, samples were washed 3 times for 10 min each in PBS at  
812 room temperature and transferred to SuperFrost Plus slides (Fisher). Excess fluid was  
813 removed, and 40l Vectashield Plus with DAPI (Vectashield) mounting media was added



814 before coverslips (Fisherbrand, 22mm wide, 0.13-0.17mm thick), which were sealed with  
815 clear nail polish. Slides were stored at 4°C. The polyclonal anti-ZIP11 antibody was raised in  
816 Rabbits to a fusion protein containing amino acids 93-193 of the Human ZIP11 protein  
817 (MyBioSource, MSB1497597). The monoclonal anti-VGLUT2 antibody was raised in Mice  
818 immunized to a full length recombinant protein corresponding to rat VGLUT2 (Abcam,  
819 ab79157) and has been previously shown to stain VGLUT2 in zebra finches (86). The staining  
820 patterns of these antibodies were visualized using species appropriate secondary antibodies  
821 covalent linked to Alexa fluor 488 or Alexa fluor 633. Images were acquired using confocal  
822 microscopy. The degree of co-localization was evaluated using Mander's co-localization  
823 coefficients (85 ).

## 824 **Electrophysiology**

825 We prepared brain slices from Bengalese finches (60-90 d post-hatch) raised in our  
826 breeding colony. Birds were anesthetized with isoflurane and decapitated. Brains were rapidly  
827 removed and placed in an ice-cold cutting solution consisting of (in mM): 125 C<sub>5</sub>H<sub>14</sub>CINO, 3  
828 MgSO<sub>4</sub>, 0.5 CaCl<sub>2</sub>, 2.5 KCl, 25 NaHCO<sub>3</sub>, and 35 glucose. Sections (260-300 μm) were cut on  
829 a Leica VT1000 microtome. In preparation for electrophysiology, slices were incubated at  
830 36°C in recording ACSF with high magnesium to reduce polysynaptic activity (consisting of (in  
831 mM): 125 NaCl, 3 MgSO<sub>4</sub>, 1 CaCl<sub>2</sub>, 2.5 KCl, 25 NaHCO<sub>3</sub>, and 35 Glucose) for 30-60 minutes.  
832 Slices were then maintained at room temperature in well-oxygenated (95% O<sub>2</sub>-5% CO<sub>2</sub>)  
833 holding chambers until transfer to the electrophysiological recording chamber. All recordings  
834 were made in oxygenated ACSF solution at room temperature (20-25°C). Glass electrodes  
835 (3-8 MΩ) were filled with intracellular solution containing (in mM) 120 KGluc, 0.1 EGTA, 40  
836 HEPES, 5 KCl, 0.3 MgCl<sub>2</sub>. Targeted recordings were made under DIC-IR visualization using  
837 an Olympus BX-51 microscope and a camera (FLIR Chameleon). HVC was identified by its  
838 visible borders under transillumination. Antidromic stimulation of the HVC neurons projecting  
839 to RA was performed with bipolar stimulating electrodes placed in the efferent tract leading to  
840 RA (100-150 μm separation, FHC, Bowdoin). Recordings were made with a Multiclamp

841 700B (Molecular Devices), controlled by custom acquisition software written in Matlab. Pipette  
842 capacitance and series resistance were compensated online and series resistance was  
843 monitored periodically. Recordings with monotonic changes in input resistance greater than  
844 25% were discarded, as were recordings with monotonic changes in holding current greater  
845 than 60pA. Voltage clamp data was acquired at 10 kHz, and filtered at 3kHz. EPSCs were  
846 recorded at -70mV in the presence of the GABA-A receptor antagonist, Gabazine (SR-95531,  
847 10-25  $\mu$ m), in the bath solution. N, N, N', N' -Tetrakis(2-pyridylmethyl)ethylenediamine  
848 (TPEN, Sigma) was infused into the bath at 20-100  $\mu$ m. ZX1 was infused into the bath at 100  
849  $\mu$ m. The peak amplitude of synaptic events was compared pre and post-chelation. One cell  
850 was excluded due to the appearance of an extra EPSC, induced by application of chelator,  
851 occurring before the original EPSC preventing an accurate estimate of changes in amplitude.

#### 852 **mRNA transcript preparation and quantification**

853 Fresh coronal sections containing the brain region HVC were cut as described above  
854 for electrophysiology, and then transferred to microdissection dishes and kept in ice-cold  
855 cutting solution. HVC and the region surrounding HVC were separately microdissected and  
856 transferred to a 1.5ml microfuge tube and any remaining cutting solution removed.  
857 Immediately afterward, 90ul of TRIzol (ThermoFisher) was added. Samples were then stored  
858 at -80°C. When ready for analysis, samples were thawed, and tissue was macerated in the  
859 1.5ml microfuge tube using RNase-free disposable pellet pestles (Fisherbrand). Samples  
860 were then incubated at room temperature for 5 min, 20ul chloroform was added, and samples  
861 were incubated for a further 2 min. Samples were then centrifuged at 12,000 g and 4°C for 15  
862 min. The aqueous phase was transferred to a new tube, and the organic phase stored at -  
863 80°C. Following the addition of 10ug of RNase free glycogen, the transferred aqueous phase  
864 was incubated at room temperature for 1 min. 20ul of isopropanol was added, and the tubes  
865 were incubated at room temperature for 10 min. Samples were then centrifuged at 12,000 g  
866 and 4°C for 15 min, and the supernatant discarded. The RNA pellet was washed in 100ul

867 75% Ethanol and centrifuged at 7,500 g and 4°C for 5 min. The supernatant was removed,  
868 and the RNA pellet was air-dried and stored at -80°C.

869 The ProtoScript II (NEB) reverse transcription system was used to create cDNA from  
870 RNA samples. For each sample, the entire RNA pellet was solubilized in 6ul RNase free  
871 water, and 2ul of the poly-T reverse transcription primer (d(T)<sub>23</sub> VN at 50 μM) was added.  
872 RNA/primer mixtures were then denatured at 65°C for 5 min and placed directly on ice. 10μl  
873 ProtoScript II reaction mix and 2μl ProtoScript II enzyme mix were added to the RNA/primer  
874 mixtures, and the entire reaction was incubated at 42°C for one hour. Samples were  
875 incubated at 80°C for 5 minutes to heat inactivate the enzymes, and stored at -80°C.

876 For each gene, transcript levels were assessed by Quantitative PCR (qPCR).  
877 Reactions were performed using the PowerUp SYBR Green Master Mix (ThermoFisher).  
878 Each reaction was conducted in triplicate on a 96 well qPCR plate (ThermoFisher). For each  
879 replicate reaction, 5μl of master-mix was combined with 1ml template and nuclease-free  
880 water to a final volume of 10μl with 400nM final concentration of gene specific primers (Table  
881 S3). Each reaction was mixed gently and stored on ice before conducting the qPCR reaction.  
882 Reactions were conducted in a QuantStudio 6 Real-Time PCR machine (Applied  
883 Biosystems). A standard two step PCR protocol was used. Samples were incubated at 50°C  
884 for 2 minutes then heated to 95°C and incubated for 2 minutes. A cycle of two steps was  
885 repeated 40 times, in which incubation at 95°C for 15 second was followed by incubation at  
886 60°C for 1 minute. Data from the qPCR reactions were analyzed using the QuantStudio 6  
887 software and cycle threshold (Ct) values were identified for each sample. For each sample,  
888 relative Ct values for *SLC39A11* were determined by taking the difference between the  
889 *SLC39A11* Ct and the Ct levels of the housekeeping gene PPIA thus controlling for variation  
890 in total mRNA input.

## 891 **Primary neural culture and siRNA screening**

892 All siRNA molecules used for *in vivo* manipulations of gene expression were first  
893 screened for efficacy *in vitro*; all sequences were tested for their ability to reduce the targeted  
894 gene transcript in cultured Bengalese finch neuronal cells. Prior to cell preparation, tissue  
895 culture treated flat bottom 96 well plates (Corning) were incubated in a thin layer of 1mg/ml  
896 Laminin (Sigma) solubilized in HBSS with magnesium and calcium (Life Technologies, no  
897 phenol red) for 2 hours at 37°C followed by 3 washes in HBSS alone. Chambers were  
898 incubated with a thin layer of Poly-L-Ornithine (Life Technologies) at 37°C overnight and  
899 washed 3 times with HBSS alone the following day. 1-14 day old birds were euthanized with  
900 isofluorane and brains were removed in ice cold HBSS. Following removal of the dura, brain  
901 cells were dissociated in pre-warmed papain (Worthington, 20U/ml in HBSS) at 37°C for  
902 45min. After incubation, tissue was triturated with a 5ml Pasteur pipette 15 times then  
903 centrifuged at 1200rpm for 5 min. The supernatant was aspirated and the pellet was washed  
904 with 7mg/ml Ovomucoid Trypsin inhibitor (Worthington) in HBSS and centrifuged again at  
905 1200rpm for 5 min. Supernatant was aspirated and the pellet was resuspended in 5ml warm,  
906 filtered Neurobasal A Complete media (NBAC; Neurobasal A, N2 supplement, B27  
907 supplement, Glutamax, penicillin and streptomycin; Life Technologies). The solution was then  
908 triturated 15 times with a fire polished 5ml Pasteur pipette and filtered through a 1000µm cell  
909 strainer (Corning). The concentration of cells was measured using a hemocytometer (Fisher  
910 Scientific) and cells were diluted to a concentration of  $5 \times 10^5$  cells per ml in warm NBAC. 400µl  
911 of cell suspension was placed in each well of the 96 well plate and incubated at 37°C for 5  
912 hours at which point the culture media was removed and replaced with 500µl of fresh warm  
913 NBAC. Cultures were then incubated at 37°C and 5% CO<sub>2</sub>. 50% of media was exchanged every  
914 3-4 days.

915 Once neural processes formed (after ~1 week) the cell cultures were used to test  
916 siRNA molecules. For each siRNA tested, knockdown experiments were conducted in  
917 duplicate using the RNAiMAX (Life Technologies) transformation reagent. For each siRNA  
918 25µl of Opti-MEM Medium (Life Technologies) was mixed with 1.5µl of RNAiMAX reagent.  
919 Separately, 25µl of Opti-MEM Medium was mixed with 5pmol paired siRNA molecules  
920 (Dharmacon). These two mixtures were then combined and incubated at room temperature

921 for 5min. Following incubation, 10µl of the RNAiMAX/siRNA mixture was added to each of two  
922 wells of neural cell culture. Cultures were then incubated at 37°C and 5% CO<sub>2</sub> for 2 days.  
923 After incubation, RNA from each well was purified, converted to cDNA, and quantified using  
924 the protocol described in mRNA transcript preparation and quantification (above). The mRNA  
925 expression level of the 'target' gene was compared between cells exposed to experimental  
926 siRNA molecules and cells exposed to a control siRNA molecule. The siRNA resulting in  
927 maximal knockdown of *SLC39A11* transcript (Table S4 and Fig. S4) was then used for all *in*  
928 *vivo* experiments.

### 929 **siRNA injections**

930 Prior to injection, siRNAs were complexed with the transfection reagent BrainFectIN  
931 (Oz Biosciences). siRNA molecules were added to BrainFectIN at a ratio of 1 µg siRNA:1.5  
932 µg BrainFectIN and incubated at room temperature for 20 min and then used within 20min.  
933 Concurrently, birds were deprived of food and water for 1 hour, and then anesthetized with an  
934 intramuscular injection of 30–40 µl of equithesin (0.85 g of chloral hydrate, 0.21g of  
935 pentobarbital, 0.42g of MgSO<sub>4</sub>, 2.2 ml of 100% ethanol, and 8.6 ml of propylene glycol to a  
936 total volume of 20ml with water). Following craniotomy and removal of the dura, siRNA  
937 complexes were injected into HVC bilaterally. The stereotactic coordinates used were 2.0ml  
938 medial/lateral, 0 dorsal/ventral relative to the y-sinus, with the head oriented with a beak angle  
939 of 50 degrees. siRNA complexes were introduced at multiple points between 700-250 µm  
940 below the surface of the brain using a Nanoject-2 (Drummond Scientific), culminating in a  
941 total injection volume of 10 µl per hemisphere. In each hemisphere, after the final injection,  
942 the pipette was left in place for ~10 minutes before full retraction. Baseline, 'pre' manipulation  
943 song tempo data was collected for a full day prior to injection, and 'post' manipulation data  
944 was analyzed from the first full day of singing (the second day post-surgery in all cases). All  
945 siRNAs were synthesized by Dharmacon. Control and experimental siRNA sequences are  
946 presented in Supplemental Table 4.

947 **Clioquinol injections**

948 Clioquinol (CQ) was solubilized in DMSO at a concentration of 40mg/ml. For all birds  
949 and all experiments, 6  $\mu$ l of either DMSO or DMSO+CQ was injected intramuscularly at 11  
950 am. The tempo of songs produced before 11am were then compared to the tempo of songs  
951 produced after 12pm.

WITHDRAWN  
see manuscript DOI for details



952 **Supplementary Figures**

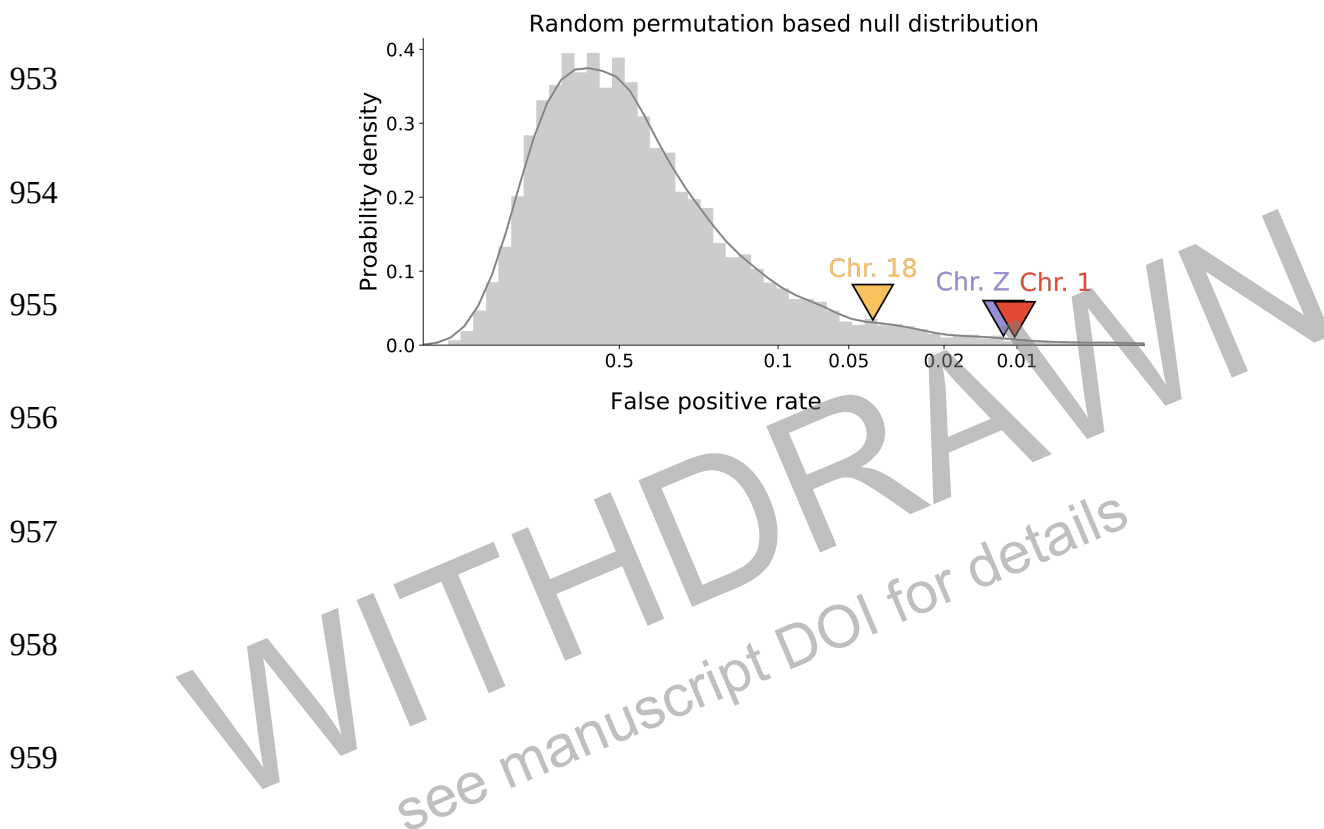

960 **Fig. S1. Permutation based genome-wide null probability distribution for association**  
961 **between song tempo and allelic state.**

962 Null probability distribution resulting from 10,000 permutations of the complete linkage  
963 analysis as shown in Figure 1D. Before each permutation, the phenotype and bird identity  
964 were randomly shuffled; thus, each analysis retained the genetic architecture of the overall  
965 population but dissociated this architecture from song tempo. The distribution comprises the  
966 TDT statistic for the single most significant sliding window (of 20 makers) from each  
967 permutation. Critical values for genome-wide significance were calculated as the  $100 \cdot (1 - \alpha)$   
968 percentile of this distribution where  $\alpha$  is the false positive rate. Colored arrows indicate the  
969 most significant sliding window for each of three regions (see Figure 1) significantly linked to  
970 song tempo.

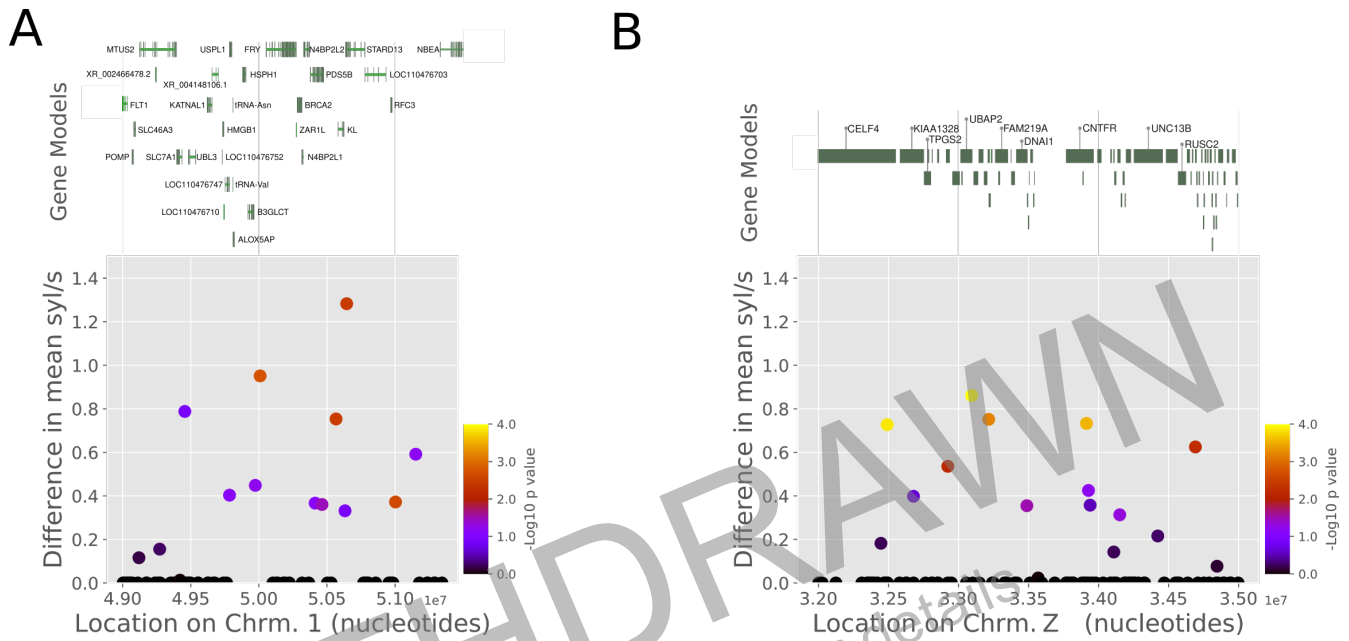

972

973

974 **Fig. S2. Effect size associated with individual markers within genomic regions on**  
 975 **Chromosomes 1 and Z.**

976 Difference in mean phenotype associated with allelic state at polymorphisms within regions  
 977 on Chromosome 1 (A) and Chromosome Z (B) that were significantly linked to song tempo. P  
 978 values for linkage at each locus are indicated by the color of the corresponding point and the  
 979 heat maps at right. Gene models within each region as determined by genome annotation  
 980 (National Center For Biotechnology Information BioProject PRJNA369279) are indicated at top.  
 981 Detail for gene models are adjusted due to differences in gene number and density. Coding  
 982 (dark green) and intronic (light green) regions are indicated in A while the length of a gene  
 983 model (both coding and non-coding) are indicated by dark green in B.

984

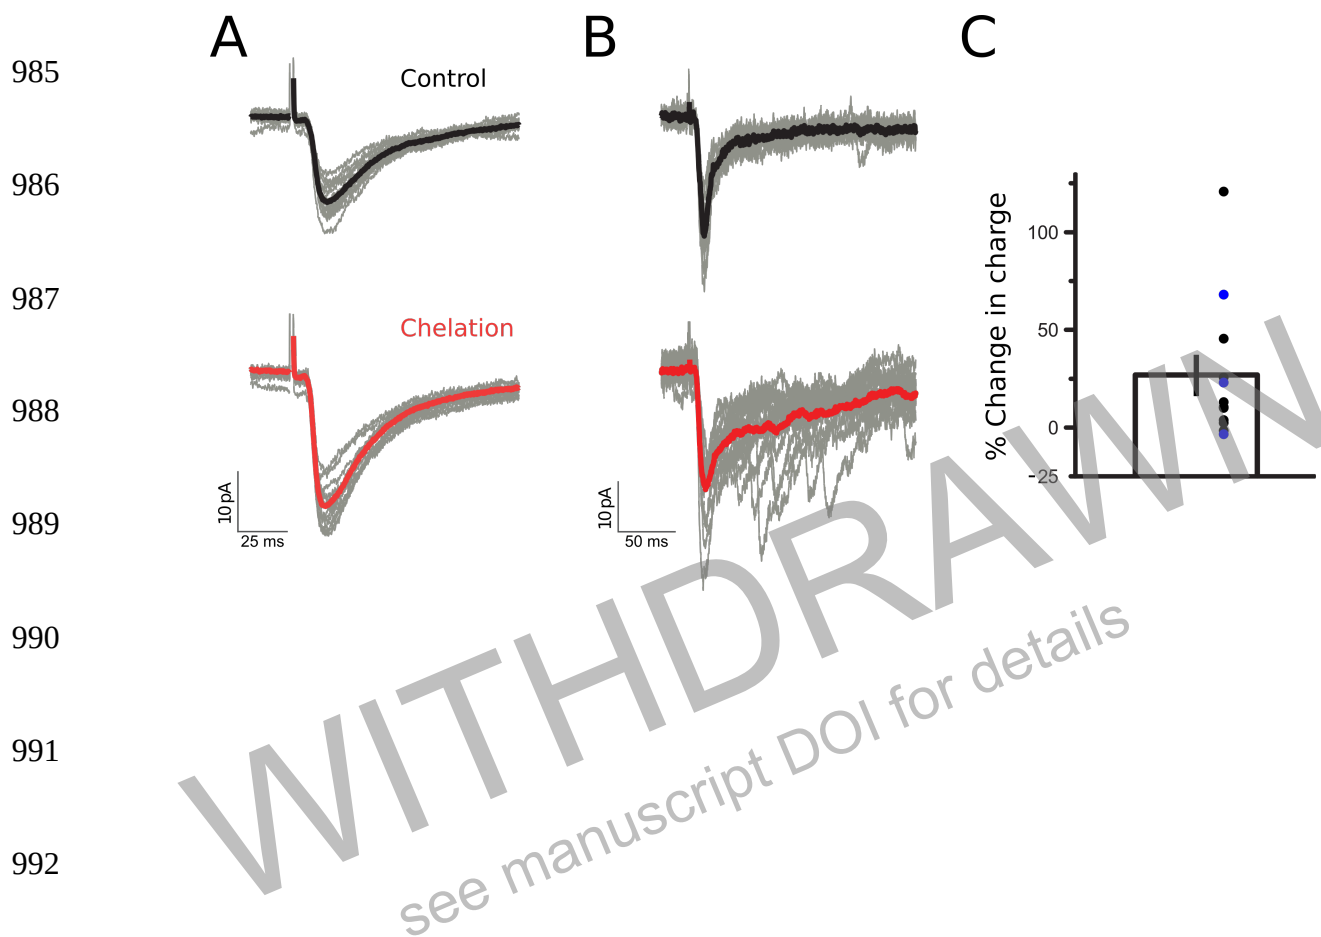

993 **Fig. S3. Zinc chelation increases synaptic currents in HVC.**

994 (A-B) Chelation of zinc increased the amplitude of synaptic events as illustrated for an  
995 individual experiment (A) and, in some cases, increased the number of synaptic events as  
996 shown in a different experiment (B). (C) Summary of increased synaptic charge transfer  
997 across experiments (blue indicates ZX1, black indicates TPEN,  $26.5 \pm 10\%$  increase in total  
998 charge transfer,  $P < 0.01$ , paired  $t$ -test,  $n = 12$  experiments in 6 birds).

999

1000

1001

1002

1003

1004

1005

1006

1007

1008

1009

1010

1011

1012

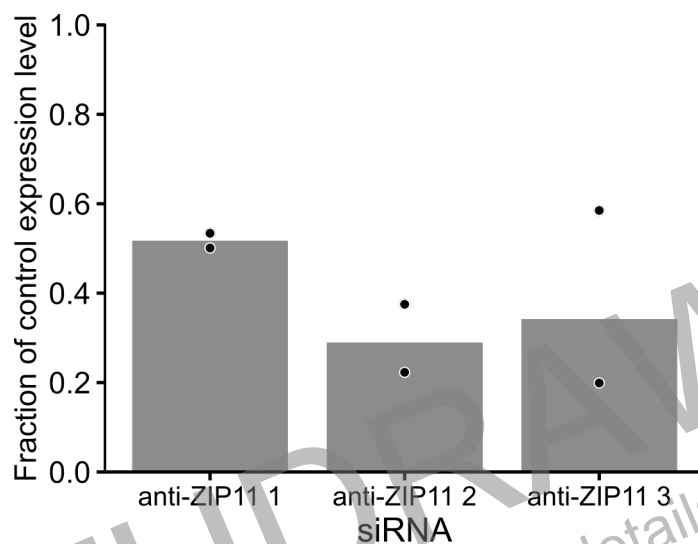

**Fig. S4. Fraction of *zip11* expression following siRNA mediated knockdown in neural culture.**

Fraction of control expression level of *zip11* following knockdown with one of 3 siRNAs.

Expression following knockdown is normalized to levels from neural culture exposed to a

control siRNA (supplemental table 4) designed to target no known Bengalese finch transcript.
